1 **Research Article**

2  
3  
4

5 **Core Proteome and Architecture of COPI Vesicles**

6  
7

8 **Manuel Rhiel<sup>1</sup>, Bernd Hessling<sup>2</sup>, Qi Gao<sup>3</sup>, Andrea Hellwig<sup>4</sup>, Frank Adolf<sup>1\*</sup> and Felix T. Wieland<sup>1\*</sup>**

9  
10

11 <sup>1</sup>Heidelberg University Biochemistry Center (BZH), Heidelberg University, Im Neuenheimer  
12 Feld 328, D-69120 Heidelberg, Germany.

13 <sup>2</sup>Core Facility for Mass Spectrometry and Proteomics (CFMP), Center for Molecular Biology  
14 of Heidelberg University (ZMBH), Heidelberg University, Im Neuenheimer Feld 282, D-69120  
15 Heidelberg, Germany.

16 <sup>3</sup>CellNetworks and Biomedical Computer Vision Group, BioQuant, Heidelberg University, Im  
17 Neuenheimer Feld 267, D-69120 Heidelberg, Germany.

18 <sup>4</sup>Interdisciplinary Center for Neurosciences (IZN), Heidelberg University, Im Neuenheimer  
19 Feld 364, D-69120 Heidelberg, Germany.

20

21 \*Address correspondence to:

22

23 Felix T. Wieland

24 Heidelberg University Biochemistry Center (BZH), Heidelberg University, Im Neuenheimer  
25 Feld 328, D-69120 Heidelberg, Germany.

26 Tel: +49-6221-54-4150

27 E-Mail: [felix.wieland@bzh.uni-heidelberg.de](mailto:felix.wieland@bzh.uni-heidelberg.de)

28

29

30 Frank Adolf

31 Heidelberg University Biochemistry Center (BZH), Heidelberg University, Im Neuenheimer  
32 Feld 328, D-69120 Heidelberg, Germany.

33 Tel: +49-6221-54-4150

34 E-Mail: [frank.adolf@bzh.uni-heidelberg.de](mailto:frank.adolf@bzh.uni-heidelberg.de)

35

36 Current address:

37 MRC Laboratory of Molecular Biology, Cambridge Biomedical Campus, Francis Crick  
38 Avenue, Cambridge CB2 0QH, UK.

39 E-Mail: [fadolf@mrc-lmb.cam.ac.uk](mailto:fadolf@mrc-lmb.cam.ac.uk)

40

41

42

43

44

45

46

47

48

49

50

51

52

53

54 Running titel: COPI Vesicle Proteome

55

56 Keywords: COPI/Coatomer/Arf/Isoforms/Vesicular Transport/Golgi/SILAC

57 **Abstract**

58 Retrieval of escaped ER-residents and intra-Golgi transport is facilitated by coat protein  
59 complex I (COPI)-coated vesicles. Their formation requires the activated small GTPase ADP-  
60 ribosylation factor (Arf) and the coat complex coatomer. Here we assess the protein  
61 composition of COPI vesicles by combining stable isotope labeling with amino acids in cell  
62 culture (SILAC) with *in vitro* reconstitution of COPI vesicles from semi-intact cells (SIC) using  
63 the minimal set of recombinant coat proteins. This approach yields an unbiased picture of the  
64 proteome of these carriers. We define a set of ~40 proteins common to COPI vesicles  
65 produced from different human as well as murine cell lines. Almost all *bona fide* COPI vesicle  
66 proteins are either ER-Golgi cycling proteins or Golgi-residents, while only a minor portion of  
67 secreted proteins was found. Moreover, we have investigated a putative role of  $\gamma$ - and  $\zeta$ -COP  
68 as well as Arf isoforms in sorting and recruitment of specific proteins into COPI vesicles. As  
69 opposed to the related COPII system, all isoforms of coatomer and all COPI-forming  
70 isoforms of the small GTPase Arf produce COPI-coated vesicles with strikingly similar protein  
71 compositions. We present a model for the core architecture of COPI vesicles.

72  
73

## 74 Introduction

75

76 One hallmark of a eukaryotic cell is the presence of a highly complex, multiple-organelle-  
77 encompassing endomembrane system through which reaction chambers for distinct  
78 biological processes are established. Transportation of biological molecules between these  
79 compartments is largely facilitated by the trafficking of various classes of transport vesicles  
80 (Bethune and Wieland, 2018; McMahon and Mills, 2004; Pryer et al., 1992). COPII vesicles,  
81 as the first in line from the perspective of a newly synthesized protein entering the secretory  
82 pathway facilitate endoplasmic reticulum (ER)-to-Golgi transport (Barlowe et al., 1994). They  
83 are formed at specialized subdomains termed ER exit sites (ERES) by successive  
84 recruitment of the small GTPase Sar1, the heterodimer Sec23/Sec24, and the hetero-  
85 tetrameric Sec13/31 outer-coat complex (Barlowe et al., 1993; Barlowe et al., 1994; Bi et al.,  
86 2002; Matsuoka et al., 1998). The late stages of the secretory pathway are mainly served by  
87 clathrin-coated vesicles (CCVs). In this system, clathrin as the outer scaffold cooperates with  
88 various compartment-specific adaptor proteins and mostly the small GTPases of the ADP-  
89 ribosylation factor (Arf)-family or specific lipids in order to form vesicles from post-Golgi  
90 membranes (Bard and Malhotra, 2006; Bonifacino, 2004; Robinson and Pimpl, 2014;  
91 Robinson, 2015). The Golgi complex is located in between these two major trafficking  
92 systems where it serves many different functions (Wilson et al., 2011). Similar to the ER, the  
93 Golgi apparatus harbors its own vesicular transport system, namely COPI-coated vesicles  
94 (Malhotra et al., 1989; Orci et al., 1986). The small GTPase Arf, especially Arf1, plays not  
95 only a pivotal role in the formation of clathrin-coated vesicles, but also in formation of COPI  
96 vesicles (Serafini et al., 1991). Once the small GTPase is activated on the Golgi membrane  
97 by a guanosine triphosphate exchange factor (GEF), it reveals a myristoylated, amphipathic,  
98 N-terminal alpha-helix that inserts into the membrane (Antonny et al., 1997; Franco et al.,  
99 1995; Kawamoto et al., 2002; Zhao et al., 2002). Membrane-associated Arf1 in turn recruits  
100 the COPI cargo-binding and membrane scaffolding protein complex, termed coatomer, from  
101 the cytosol (Donaldson et al., 1992; Hara-Kuge et al., 1994). Stabilization of coatomer on the  
102 membrane is achieved through multiple Arf1-coatomer interactions (Eugster et al., 2000; Sun  
103 et al., 2007; Zhao et al., 1997). Additional interactions of the coat with transmembrane  
104 proteins, especially members of the p24/TMED-family, lead to the formation of a productive  
105 vesicle (Bremser et al., 1999; Cosson et al., 1998; Sohn et al., 1996). These steps of vesicle  
106 formation can be recapitulated in *in vitro* reconstitution experiments from Golgi-enriched  
107 membrane fractions, liposomes, and semi-intact cells (Adolf et al., 2013; Bremser et al.,  
108 1999; Orci et al., 1993; Spang et al., 1998).

109

110 Coatomer is a stable complex that consists of the seven subunits  $\alpha$ -,  $\beta$ -,  $\beta'$ -,  $\gamma$ -,  $\delta$ -,  $\epsilon$ -, and  $\zeta$ -  
111 COP (Waters et al., 1991). Two of these,  $\gamma$ - and  $\zeta$ -COP, were shown to exist as isoforms in  
112 mammals termed  $\gamma_{1/2}$ - and  $\zeta_{1/2}$ -COP, respectively (Futatsumori et al., 2000). Following their  
113 initial identification, it was subsequently revealed that all of these isoforms are being  
114 incorporated into functional coatomer complexes (Wegmann et al., 2004) and can give rise to  
115 COPI vesicles *in vitro* (Sahlmuller et al., 2011). Whether the coatomer isoforms serve more  
116 diverging functions, however, remains largely elusive. In a previous study our laboratory  
117 found that  $\gamma$ - and  $\zeta$ -COP isoforms have different preferential intracellular localizations. While  
118  $\gamma_1$ - and  $\zeta_2$ -COP were predominantly found at the cis-Golgi,  $\gamma_2$ -COP displayed a more trans-  
119 Golgi localization (Moelleken et al., 2007). More recently it was revealed that the cytosolic  
120 protein Scyl1 binds to a specific class of Arfs and  $\gamma_2$ -COP (Hamlin et al., 2014).

121

122 Similarly, in mammals, six isoforms of Arf have been identified (Bobak et al., 1989; Kahn et  
123 al., 1991; Price et al., 1988; Tsuchiya et al., 1991). All isoforms except for Arf2 are expressed  
124 in humans. They can be grouped into three classes based on comparison of their protein  
125 sequences and intro/exon boundaries (Kahn et al., 2006). Arf1, Arf2, and Arf3 constitute  
126 class I, Arf4 and Arf5 form class II leaving Arf6 as the sole member of class III (Kahn et al.,  
127 2006; Tsuchiya et al., 1991). Arf6 is furthermore distinguished from all other Arf family  
128 members with regard to its intracellular localization. In contrast to Arf1-5, which are recruited  
129 from the cytosol to the endomembrane system upon activation with the stable GTP analogue

130 GTPγS and are sensitive to Brefeldin A (BFA)-treatment, Arf6 is firmly associated with the  
131 plasma membrane (Cavenagh et al., 1996). Moreover, a very thorough study by Volpicelli-  
132 Daley et al. showed a functional redundancy of class I/II Arfs when single knock-down  
133 experiments were performed, and a high specificity of individual Arfs when knock-downs  
134 targeted two Arfs at the same time (Volpicelli-Daley et al., 2005). Previous work from our lab  
135 assessed the potency of individual Arfs with respect to their ability to bind to Golgi  
136 membranes and function in COPI vesicle biogenesis (Popoff et al., 2011). It was shown that  
137 all human Arf isoforms, except for Arf6, are capable of doing both (Popoff et al., 2011).  
138 Despite this knowledge it still remains elusive, what function the different isoforms of Arf  
139 serve in COPI biogenesis at the molecular level.

140  
141 Considering the differential localization of the  $\gamma$ - and  $\zeta$ -COP isoforms (Moelleken et al., 2007)  
142 and the finding that different Golgi-tethers capture distinct populations of COPI vesicles  
143 (Malsam et al., 2005; Wong and Munro, 2014) one can posit that different isoforms of  
144 coatamer – and possibly Arf - give rise to distinct populations of COPI vesicles *in vivo*. One  
145 prediction of this concept is that vesicles formed predominantly or exclusively by one  
146 coatamer isoform or a distinct isoform of Arf would contain a specific set of cargo molecules.  
147 This would be similar to the mammalian COPII system in which coat protein isoforms are  
148 engaged in the differential sorting of transmembrane proteins into vesicles. For example all  
149 Q-SNAREs of the ER-Golgi-SNARE complex are exclusively enriched in COPII vesicles by  
150 interaction with the Sec24 isoforms Sec24C/D, whereas the R-SNARE Sec22b is specifically  
151 recognized by Sec24A/B (Adolf et al., 2016; Mancias and Goldberg, 2007, 2008). These  
152 findings have mainly emerged from studies that employed *in vitro* reconstitution systems.

153  
154 Several biochemical fractionation approaches coupled to quantitative mass spectrometry  
155 (MS) analysis have been developed to globally map the localization of cellular proteins  
156 (Dunkley et al., 2004; Foster et al., 2006; Gilchrist et al., 2006). While such strategies were  
157 mostly applied for large cellular organelles, even smaller subcompartments such as transport  
158 vesicles have been objectives of such investigations (Borner et al., 2006; Gilchrist et al.,  
159 2006). Studying the protein content of vesicles has proven a useful tool to assess their  
160 biological function (Borner et al., 2006; Gilchrist et al., 2006; Takamori et al., 2006). To this  
161 end, mainly two strategies were applied. In the first setup, a fraction enriched in endogenous  
162 clathrin-coated vesicles was purified from wild type cells and compared to a corresponding  
163 fraction from clathrin heavy chain (CHC) knockdown cells (Borner et al., 2006). This  
164 experimental setup was subsequently refined by the introduction of SILAC labeling (Ong et  
165 al., 2002) and rapid mislocalization of various clathrin adaptor proteins (“knock sideways”)  
166 instead of a global CHC knockdown to investigate the role of these adaptors in greater depth  
167 (Hirst et al., 2012). The second, general approach capitalizes on classical biochemical  
168 reconstitution. Gilchrist and colleagues used a membrane fraction enriched in Golgi and  
169 cytosol to produce COPI vesicles and subsequently investigated their protein content in a  
170 label-free MS setup (Gilchrist et al., 2006).

171 Recently, we have combined SILAC with *in vitro* reconstitution of COPII vesicles to assess  
172 their proteome (Adolf et al., bioRxiv 253229). Here we use the same strategy to revisit the  
173 protein composition of COPI vesicles with regard to their sources and to assess the protein  
174 compositions of isotypic COPI vesicles. SILAC proteomics of the purified vesicles allowed us  
175 to i) systematically investigate the protein compositions of COPI vesicles from various cell  
176 types and ii) challenge a putative role of  $\gamma$ - and  $\zeta$ -COP as well as Arf isoforms in the sorting  
177 of cargo molecules into these vesicles.

178

## 179 Results and Discussion

180

### 181 ***In vitro* reconstitution of COPI vesicles for quantitative mass spectrometry**

182 In order to study the protein content of COPI vesicles within an unbiased setup we decided to  
183 take advantage of a previously established methodology to produce such vesicles *in vitro*.  
184 Briefly, the minimal cytosolic machinery to reconstitute COPI vesicles – coatomer (CM) and  
185 Arf1 – are first expressed in Sf9 insect cells and *E.coli*, respectively. The purified  
186 recombinant proteins are then added to digitonin-permeabilized, semi-intact cells (SIC) to  
187 promote formation of vesicles from endogenous Golgi membranes. Newly formed vesicles  
188 can then be separated from their donor compartments via centrifugation (work-flow outlined  
189 in Fig. 1A).

190 However, when vesicle-containing fractions obtained with this setup were subjected to mass  
191 spectrometric analysis, we obtained only very limited and poor-quality data (data not shown).  
192 This could be explained by the vast amounts of soluble COPI coat proteins present in these  
193 samples, which hampered mass spectrometric analysis. To overcome this problem we  
194 capitalized on a recently developed density gradient for vesicle floatation with iodixanol as  
195 gradient medium (Adolf et al., bioRxiv 253229). Figure 1B shows a scheme of this gradient.  
196 Ten fractions were collected from top (fraction 1) to bottom (fraction 10) (Fig. 1B). Gradients  
197 loaded with control samples (reconstitution without coatomer or GTP) displayed only weak  
198 signals for the COPI vesicle membrane marker proteins ERGIC53 and p24 in fractions 2 and  
199 3. When present, coat proteins ( $\gamma$ -COP) remained in the load fraction when present (Fig. 1C,  
200 three lower panels). In samples reconstituted with either GTP or its non-hydrolyzable  
201 analogue GMP-PNP, much stronger signals were observed for ERGIC53 and p24 in  
202 fractions 2 and 3. In samples incubated with GTP, the strongest ERGIC53 and p24 signals  
203 were detected in fraction 2, while under GMP-PNP conditions both signals, were strongest in  
204 fraction 3. Furthermore, the use of GMP-PNP instead of GTP led to co-floatation of COPI  
205 membrane marker proteins and COPI coat (here detected via  $\gamma$ -COP) in fraction 3 (Fig. 1C,  
206 lower panel). The shift of the strongest vesicle membrane marker signals from fraction 3  
207 (GMP-PNP) to fraction 2 (GTP) is in agreement with a lower buoyant density expected of  
208 vesicles that have lost their coat due to GTP hydrolysis (Fig. 1C, bottom two panels).

209 To further analyze if fractions 2 and 3 represent vesicle-enriched samples, we performed  
210 electron microscopy (EM). Figure 1D shows images of ultrathin sections of the resin-  
211 embedded combined fractions 2 and 3 of the samples, which had been incubated with  
212 coatomer, Arf1 plus either GTP (left) or GMP-PNP (right). These fractions contained large  
213 amounts of vesicle-like structures of a size ranging from circa 60 to 100 nm. Larger  
214 structures that could occasionally be observed most likely represent membrane fragments  
215 released during the budding procedure and/or fused vesicles. While the generated with GTP  
216 seem to be without coat (Fig. 1D, left panel), many of those vesicles reconstituted with GMP-  
217 PNP displayed an electron-dense COPI coat on their surface (Fig. 1D, right panel).

218

### 219 **The core components of COPI vesicles from HeLa cells**

220 The experimental setup outlined in the previous section allowed us to reconstitute and purify  
221 COPI vesicles in amounts suitable for mass spectrometric analysis. Small amounts of  
222 ERGIC53 and to a lesser degree p24 positive membranes are released from semi-intact cells  
223 during reconstitution reactions even when coatomer or GTP was omitted (Fig. 1C, upper  
224 panels). These membrane contaminants behaved similar to reconstituted COPI vesicles and  
225 they most likely have two sources. Either they stem from vesicles produced with residual  
226 coat components originating from the donor SIC or they represent unspecifically released  
227 fragments from early secretory organelle membranes. In order to subtract all contaminant-  
228 based MS-signals from those that originate from COPI vesicles reconstituted with  
229 recombinant coat proteins, we decided to combine SILAC with *in vitro* reconstitution of COPI  
230 vesicles (Adolf et al., bioRxiv 253229). As outlined in the work-flow diagram in figure 2A, cells  
231 were grown in medium containing either 'light' or 'heavy' amino acids until an incorporation of  
232 the heavy amino acids greater than 95 % was reached. From such cells, *in vitro*  
233 reconstitution reactions were performed. In the example given, a standard COPI vesicle  
234 reconstitution from heavy cells was performed in parallel to a mock-reconstitution reaction



235 without coatomer from light cells that reflect the protein background.  
236 In initial experiments not only coatomer but also Arf1 were omitted in the control reaction.  
237 Under these conditions, one adaptor protein complex-1 (AP-1) subunit was enriched fourfold  
238 over the control (data not shown). Since AP-1 is a major component of Golgi-derived CCVs,  
239 this hinted to a significant contamination of our COPI vesicle samples with AP-1/CCVs. As  
240 the formation of AP-1/CCV is also Arf1-GTP dependent (Stamnes and Rothman, 1993;  
241 Traub et al., 1993), Arf1 was included in the control experiments to allow filtering for the AP-  
242 1-dependent signal. With Arf1 included in the control, the highest SILAC ratios obtained in  
243 two data sets for an adaptor-complex subunit, AP-1 gamma, were 1.6 and 1.3, respectively  
244 (Suppl. Tab. 1). Since the coat proteins of potentially contaminating vesicle types display  
245 such low SILAC ratios, it can be expected that with this experimental setup solely vesicles of  
246 the COPI type are being recorded.  
247 After floatation, the vesicle-containing fractions 2 and 3 from all reactions were pooled,  
248 processed by SDS-PAGE and their protein content analyzed via mass spectrometry (Fig.  
249 2A).  
250 To exclude possible influences of the isotopic labeling, experiments were always performed  
251 with switched labels and at least in duplicate. As an example, the SILAC ratios obtained from  
252 two independent experiments are plotted in figure 2B. Clearly, the two independent  
253 experiments yield highly correlative results. The  $R^2$  value obtained for the entire dataset is  
254 0.7 and it even rises to 0.83 when the strongly diverging SILAC ratios for ZFPL1 (29.5 and  
255 4.3) are neglected. The majority of proteins identified display SILAC ratios close to or below  
256 one, marking them as contaminants due to a close-to-equal abundance in both the heavy  
257 and the light samples. A large number of proteins, however, yielded considerably elevated  
258 SILAC ratios pinpointing them as proteins which are enriched in COPI vesicles (Fig. 2B and  
259 C). As cutoff for further analyses, a twofold enriched of candidate proteins was chosen as it  
260 is a common criterion and many known COPI proteins were found within this margin. In three  
261 “COPI reconstitution versus mock” experiments performed with HeLa cells, 102 proteins  
262 displayed a mean-enrichment of more than twofold within at least two independent  
263 experiments. An additional 20 proteins were greater than twofold-enriched in one of the  
264 measurements where the COPI membrane source was isotope-labeled, and thus represent  
265 the top COPI protein candidates. These 122 candidates (further referred to as “top 122”)  
266 constitute the COPI proteome of HeLa cells. The 100 of the top 122 proteins with the highest  
267 SILAC ratios are listed in figure 2C (complete list with the full protein names in Suppl. Tab.  
268 1). Roughly half of the top 122 proteins were identified in all three experiments. Amongst the  
269 top 122 proteins are a large number of transport machinery proteins that cycle in the early  
270 secretory pathway (e.g. p24/TMED family proteins, LMAN1/ERGIC53, and the KDEL  
271 receptor). These proteins are known COPI vesicle constituents, e. g. members of the  
272 p24/TMED family that play a critical role in recruiting coatomer to Golgi membranes (Bremser  
273 et al., 1999; Gommel et al., 1999) and are also implicated in serving as ER-export receptor  
274 for GPI-anchored proteins (Bonnon et al., 2010). Also the well-characterized ER-Golgi  
275 cycling protein LMAN1/ERGIC53, known to directly bind to coatomer via a conserved KKXX  
276 motif at its C-terminus (Schindler et al., 1993), was enriched in the vesicle fraction. These  
277 findings underline the role of COPI carriers as shuttle between ER and Golgi.  
278 Another group of proteins highly enriched is involved in trafficking and fusion of vesicles such  
279 as SNARE proteins (e.g. Sec22b, Stx5, and GOSR1) or Rab proteins (e.g. Rab2A, Rab6A,  
280 and Rab18). All these proteins are known to function in early steps of protein transport at the  
281 ER and/or Golgi (Dejgaard et al., 2008; Hong and Lev, 2014; Hutagalung and Novick, 2011).  
282 Furthermore, the large number of Golgi enzymes (e.g. MAN1A2, ZDHHC13, GALNT1) found  
283 in the dataset highlights the role of COPI in intra-Golgi retrograde transport. Likewise, Golgi  
284 tethers and interacting proteins are found in this COPI vesicle fraction (cf. Fig1D, e.g. ZPFL1,  
285 GOLGA5, GOLGB1).  
286 Soluble ER-residents often carry a KDEL sequence at their C-terminus, important for their  
287 retrieval by COPI vesicles (Munro and Pelham, 1987). Accordingly several of the most  
288 abundant ER proteins (Itzhak et al., 2016) i.e. CALR, P4HB, HSPA5 (BiP), and SERPINH1  
289 are found in the COPI proteomics dataset.  
290 With the exception of a very few proteins (e.g. LPL, CGREF1, TGFBI, and LGALS3BP) all

291 proteins identified can be either assigned to the ER or the Golgi complex. It is of note that  
292 NUCB1 and NUCB2 are the only soluble Golgi proteins that are found in COPI vesicles.  
293 We further tried to identify cytosolic proteins that bind to COPI vesicles, both in their coated  
294 or uncoated state. To this end, we slightly modified our SILAC proteomics workflow (Fig. 2A)  
295 by including unlabeled or labeled cytosol to vesicle reconstitutions. Furthermore, we  
296 performed these experiments either with GTP, or the non-hydrolyzable analog GTP $\gamma$ S to  
297 retain the coat proteins on the vesicles (Fig. 1C). With GTP $\gamma$ S we noted a population of  
298 proteins clearly enriched in comparison to a reaction performed with GTP (Fig. S1B). These  
299 proteins, however, with minor exceptions, were not of cytosolic origin, but instead possess  
300 transmembrane domains and locate to the early secretory pathway, mostly the ER (e.g.  
301 translocon-associated protein subunit alpha/delta, atlastin 2/3, reticulon 1/3/4). Among the 50  
302 proteins with the highest SILAC ratios, only two proteins are truly cytosolic (Fig.S1B, Suppl.  
303 Tab. 9 and text). Whether the cytosolic proteins are absent because they did not bind to  
304 COPI vesicles or if the experimental procedures did not allow their recovery, we cannot say.  
305 We noticed, however, that incubation of SIC with cytosol and GTP $\gamma$ S causes shedding of ER  
306 membranes (Fig. S1C, Suppl. Tab. 9 and text)

### 307 308 **Comparison of isotypic COPI vesicles.**

309 The heptameric coat building block of COPI, coatomer, comprises two subunits ( $\gamma$ -COP and  
310  $\zeta$ -COP) that exist as two isoforms. Coatomer with either combination of these isoforms can  
311 be purified as recombinant protein complex (Fig. 3A), and it has been shown that all can give  
312 rise to vesicles *in vitro* (Sahlmuller et al., 2011). For both  $\gamma$ - and  $\zeta$ -COP, the two isoforms  
313 show a high level of identity: 81 % for murine  $\gamma$ -COP isoforms, and 73 % for  $\zeta$ -COP isoforms  
314 (Fig. 3B). The most striking difference is a  $\sim$ 30 amino acid N-terminal extension that can be  
315 found in  $\zeta_2$ -COP (Fig. 3B).

316 To challenge a possible role of these isoforms in cargo selection, we decided to use the  
317 SILAC-based COPI proteomic approach as outlined in figure 2A, to directly compare the  
318 protein content of COPI vesicles made with varying coatomer isoform compositions. Figure  
319 3C shows a scatter plot, representing two independent proteomic comparisons of vesicles  
320 produced with coatomer containing  $\gamma_1/\zeta_1$ -COP (CM $\gamma_1\zeta_1$ ) versus CM $\gamma_2\zeta_1$ . In contrast to a  
321 scatter plot that shows the comparison of vesicles and a mock-reaction (Fig. 2B), no relevant  
322 enrichment of proteins could be determined. In fact, the vast majority of proteins crowds at  
323 around a SILAC ratio of one.

324 In figure 3D the 25 proteins are listed with the highest SILAC ratios when CM $\gamma_1\zeta_1$  is  
325 compared either with CM $\gamma_1\zeta_2$  or CM $\gamma_2\zeta_1$ . None of the proteins showed SILAC ratios of  $>2$   
326 (comparison CM $\gamma_1\zeta_1$  vs. CM $\gamma_1\zeta_2$ ) or even  $>1.5$  (comparison CM $\gamma_1\zeta_1$  vs. CM $\gamma_2\zeta_1$ ). Altogether,  
327 the isoforms 1 of both  $\gamma$ - and  $\zeta$ -COP do not seem to select proteins in COPI vesicles different  
328 from those incorporated by the isoforms 2.

329 In order to further examine whether the isoforms 2 enrich proteins which are not enriched by  
330 isoforms 1, we inverted the SILAC ratios obtained in the experiments where COPI vesicles  
331 were made with CM $\gamma_1\zeta_1$  from heavy cells (conversion of heavy/light to light/heavy ratios). The  
332 resulting data shows, that also  $\gamma_2$ - and  $\zeta_2$ -COP do not concentrate proteins in COPI vesicles  
333 different to those of their isoform counterparts (Fig. 3D). The only protein that exceeds a  
334 mean enrichment greater than twofold in the comparison of CM $\gamma_2\zeta_1$  vs. CM $\gamma_1\zeta_1$ , ATP5A1, can  
335 be excluded as potentially isoform-specific cargo due its intra-cellular localization to  
336 mitochondria. Moreover, ATP5A1 was considerably enriched in only one of the two  
337 independent experiments (Fig. 3C and D). Other proteins that have ratios close to two, i.e.  
338 ATP5B and HSPD1, despite showing more consistent SILAC ratios (Fig. 3C and D) can also  
339 be discarded due to their localization to mitochondria.

340 Similarly, the comparison of CM $\gamma_1\zeta_2$  vs. CM $\gamma_1\zeta_1$  did not identify any isoform-specific COPI  
341 cargoes. The only protein that displayed a more than twofold enrichment was the  
342 monocarboxylate transporter 1 (SLC16A), which like ATP5A1, showed strongly divergent  
343 SILAC ratios of 6.1 and 1.4 (Fig. 3D and S2A-C).

344 In summary, it is more likely that the subtle changes in abundance observed for a few  
345 proteins (Fig. 3D and Suppl. Tab. 2 and Tab. 3) are the result of small differences in vesicle  
346 production and sample preparation rather than actual cargo-sorting events.

347 Notably, although coatomer isoforms are differentially distributed across the Golgi (Moelleken  
348 et al., 2007), Golgi enzymes that are located to specific positions within the Golgi-stack, did  
349 not show any indication of being selected by particular coatomer isotypes.  
350 Having excluded a role of coatomer isoforms in sorting of prominent COPI cargo proteins, we  
351 decided to investigate a possible influence on another physical parameter: the size of  
352 vesicles. To this end we determined from electron microscopic images the diameter of  
353 vesicles that were reconstituted with one particular CM isoform at a time. As a control, a  
354 preparation of coatomer from rat cytosol containing all isoforms was included. EM images of  
355 reconstitutions from Golgi enriched membranes are shown in figure S3A-D. In figure S3E-F  
356 examples are given for the evaluation process. Figure S3E depicts the vesicles used for  
357 analysis marked in green, and in figure S3F just the extracted areas are shown. A summary  
358 of all measurements is given in figure 3E. The average size of COPI vesicles reconstituted  
359 under all four conditions tested varies only slightly, with diameters between 73.4 ( $\pm 8.8$  nm)  
360 and 74.4 ( $\pm 8.9$  nm), in perfect agreement with the first characterization as a (then unknown)  
361 mixture of isoforms (Orci et al., 1989).  
362

### 363 **Comparison of Arf isoforms in COPI vesicle reconstitution**

364 ADP-ribosylation factor (Arf) initiates the formation of COPI vesicles at the Golgi and is a  
365 stoichiometric component of their coat (Dodonova et al., 2017; Dodonova et al., 2015). Four  
366 of the five human Arf family members are capable of producing COPI vesicles (Popoff et al.,  
367 2011). This is further corroborated by the identification of Arf4 in the COPI proteome of HeLa  
368 cells as presented in the previous sections (Fig. 2C). We decided to analyze the protein  
369 content of COPI vesicles in response to usage of different recombinant Arf isoforms (Fig. 4A)  
370 for their formation. When using Arf3-5, likely due to a lower yield, less peptides and proteins  
371 were identified in COPI samples compared to Arf1. The number of proteins that are more  
372 than twofold-enriched ranges from 25 for COPI vesicles made with Arf3 to 55 for  
373 reconstitutions with Arf5 (Fig. 4B-E and Suppl. Tab. 4-6). The proteins identified in vesicles  
374 made with Arf3-5 almost entirely overlap with those formed with Arf1 (Fig. 4F and Suppl.  
375 Tab. 12). Twenty proteins were identified in twofold enriched in COPI vesicles reconstituted  
376 with all Arf isoforms (Fig. 4 F). Among the shared proteins are 5 members of the TMED/p24  
377 family, the SNAREs Syntaxin5 and Sec22b as well as the ER-Golgi cycling proteins ERGIC1,  
378 ERGIC2, and SURF4. Additionally, sixteen proteins are found in three vesicles types, and  
379 thirteen in COPI vesicles made with two different Arf isoforms. Most proteins found in  
380 multiple datasets display high SILAC ratios (compare SILAC ratios in Suppl. Tab. 12). In  
381 contrast, those proteins found exclusively in COPI vesicles reconstituted with a particular Arf-  
382 isoform display SILAC ratios lower than the average of the whole dataset (Suppl. Tab. 12).  
383 For example, those 20 proteins which are COPI candidates with all Arfs display a mean  
384 SILAC ratio of 8.0 in COPI vesicles made with Arf1. In contrast, those 57 proteins unique to  
385 the Arf1 candidate list show a mean ratio of 3.31 while the average ratio among all 122  
386 candidates is 4.5 (Suppl. Tab. 12). We conclude that Arf1 is the most productive COPI-  
387 forming GTPase, however, the Arf isoforms 3-5 also produce vesicles with highly similar  
388 content.  
389

### 390 **COPI proteomics of HepG2 cells and murine macrophages**

391 Having set up a robust assay to measure the content of COPI vesicles produced from semi-  
392 intact HeLa cells, we decided to apply the same strategy to vesicles from other cell lines in  
393 order to determine possible differences. We chose hepatocyte-like HepG2 cells as well as  
394 immortalized murine macrophages (iM $\Phi$ ) as additional cell lines. As evidenced by the scatter  
395 plots shown in figures 5A and B, reproducible and robust SILAC ratios for several hundred  
396 proteins could be determined. It is of note that the SILAC ratios obtained from vesicles of  
397 HepG2 cells are on average lower than those of HeLa and iM $\Phi$  cells, with solute carrier  
398 SLC35E1 showing the highest mean ratio, 5.2. Applying the same criteria (>twofold  
399 enrichment) outlined in the previous section we were able to define a COPI proteome for  
400 HepG2 cells encompassing a total of 69 proteins. Mass spectrometric analysis of vesicle  
401 reconstitutions from iM $\Phi$  yielded 144 proteins, considerably more than we obtained from  
402 HepG2 cells. The 50 proteins with the highest SILAC ratios as found in COPI vesicles from



403 HepG2 and iMΦ cells respectively are listed in figures 5C and D (complete lists in Tables 7  
404 and 8 of the Supplement). A large number of proteins is found in both lists and was  
405 furthermore identified in HeLa cells (Figure 2C). A direct comparison of all proteins reveals  
406 that a shared set of 39 proteins is at least twofold enriched within the COPI proteome  
407 datasets of all three cell types (Fig. 5E and Suppl. Tab. 11). The shared 39 proteins, listed in  
408 figure 5F, account for different functional groups. In addition to e.g. fusion machinery there is  
409 a clear enrichment of early cycling proteins e.g. p24/TMED family proteins,  
410 LMAN1/ERGIC53, or Rer1 (Suppl. Tab. 11). Notably, most of these 39 conserved proteins  
411 exhibit high SILAC ratios (Figs. 2D and 5C and D). For example do these shared candidates  
412 display a mean SILAC ratio of 6.66 in HeLa cells, while candidates unique to this cell line  
413 show an average ratio of 3.45 (Suppl. Tab. 11). In addition to the 39 globally shared proteins,  
414 18 proteins are shared only between HeLa and HepG2 cells, 19 between HeLa and iMΦ  
415 cells, and 7 proteins between HepG2 cells and iMΦ (Figs. 5E and Suppl. Tab. 11). This  
416 leaves iMΦ with 78 unique COPI proteins, whereas only 5 of the 69 COPI proteins are  
417 unique in HepG2 cells (Figs. 5E and Suppl. Tab. 11).

418 Among the conserved proteins are nonaspanins. Two of the four nonaspanin family  
419 members (TM9SF1/3) are conserved components across COPI proteomes of HeLa-,  
420 HepG2- and iMΦ cells (Suppl. Tab. 11). TM9SF2 and TM9SF4, despite being identified in all  
421 three cell lines, displayed a moderate enrichment in COPI vesicles reconstituted from iMΦ,  
422 and in case of TM9SF4 also from HeLa cells. These proteins possess a C-terminal Golgi-  
423 retention motif based on the consensus-sequence KXD/E (Woo et al., 2015). Their  
424 conserved presence and the presence of many Golgi enzymes (e.g. B3GAT3, GALNT1,  
425 MAN2A1) emphasizes that COPI vesicles actively prevent the default-secretion of Golgi-  
426 residents. Moreover, enzymes involved in carbohydrate biosynthetic pathways account for  
427 the single largest group of proteins unique to iMΦ.

428 It is of note that overall very few soluble, secreted proteins are found with a SILAC ratio >2.  
429 Examples are the alpha-fetoprotein (AFP) found in HepG2 cells, or complement C1q  
430 subcomponent subunit beta (C1QB), while other secreted proteins, e.g. apolipoprotein E  
431 (APOE), or serotransferrin (TF) did not show any significant enrichment (Suppl. Tab. 1 and  
432 Tables 7-9). This observation is compatible with secretion via bulk-flow (Wieland et al.,  
433 1987), where active uptake into COPI vesicles is restricted to proteins for retrograde  
434 transport, while cargo for secretion is assumed to diffuse freely inside the secretory  
435 organelles and not to be concentrated at sites of vesicle production. In summary, our data  
436 highlights the presence of a strictly conserved set of proteins found in the proteomes of COPI  
437 vesicles across cell types and species. Apart from this core machinery of roughly 40 proteins  
438 (listed in Fig. 5F), various mammalian cells types seem to harbor a specific set of additional  
439 proteins.

## 440 441 **Conclusions**

442 We have investigated the proteome of COPI vesicles using a novel experimental setup,  
443 combining vesicle *in vitro* reconstitution from semi-intact cells and SILAC mass spectrometry  
444 (Adolf et al., bioRxiv 253229). We could identify with high fidelity a total of 213 proteins in  
445 COPI vesicles formed from three different cell types (Suppl. Tab. 11). The largest number of  
446 proteins (144) was identified in COPI vesicles made from immortalized murine macrophages.  
447 In HeLa cells 122 proteins were identified, and in HepG2 cells 69. A set of 39 proteins was  
448 present in COPI vesicles formed from all three cell lines, HeLa, HepG2, and iMΦ (Suppl.  
449 Tab. 11). These proteins, most of which cycle between the ER and the Golgi apparatus,  
450 define the basic COPI vesicle proteome and thus likely represent vesicular machinery. Many  
451 of these constituents of the COPI core proteome were found in a previous proteomic analysis  
452 of the secretory pathway, however together with several hundreds of additional proteins,  
453 which made it difficult to assign components of COPI vesicles with sufficient fidelity (Gilchrist  
454 et al., 2006).

455 The consistent finding of the soluble calcium binding proteins NUCB1/2 as luminal  
456 constituents of COPI vesicles, in line with their localization to the Golgi apparatus (Lin et al.,  
457 1998) and previous studies (Gilchrist et al., 2006; Rutz et al., 2009), hints towards a role of  
458 COPI vesicles in storage and release of calcium.

459 Another hypothetical role for a calcium binding protein as a major constituent of COPI  
460 vesicles is a function in calcium-regulated protein transport. In analogy to the pH-dependent  
461 transport of KDEL receptor clients (Wilson et al., 1993), proteins could be trafficked by  
462 NUCB1/2 (likely in concert with an additional membrane-bound protein) with their capture  
463 and release being regulated by the concentration of calcium that gradually decreases from  
464 the ER towards the trans-Golgi (Pizzo et al., 2011).

465 Introducing SILAC-labeled cytosol to our workflow in combination with a non-hydrolyzable  
466 GTP analog to stabilize the coat did not reveal any additional cytosolic interactors of coated  
467 COPI-vesicles (potentially except for arfaptin-1). Instead we observed that incubation of SIC  
468 with cytosol and GTP $\gamma$ S results in unspecific release of fragments of organelles of the early  
469 secretory pathway, mostly the ER (Suppl. material Fig. S1 and text).

470 The approach allowed us to study a possible influence of different isoforms of the coatomer  
471 subunits  $\gamma$ - and  $\zeta$ -COP, as well as of the small GTPase Arf, on the content of these carriers.  
472 The protein content of COPI vesicles did not change, regardless of the various isoforms of  
473 coatomer used (Fig. 3D and Suppl. Tab. 2-3). Likewise, the protein compositions of COPI  
474 vesicles reconstituted with varying isoforms of Arf were highly similar. We noticed, however,  
475 a difference in efficiency in overall vesicle formation for differing Arfs as deduced from  
476 significantly lower numbers of peptides identified in reconstitutions with Arf3-5 as compared  
477 to Arf1. (Suppl. Tab. 12). Least proteins were identified for COPI vesicles reconstituted with  
478 Arf3. This is in line with the previous observation that Arf3 can be outcompeted from COPI  
479 vesicles by other Arf isoforms (Popoff et al., 2011).

480 In summary we did not find any indication that one of the different isoforms tested has a  
481 substantial influence on the content of cargo in reconstituted COPI vesicles. Moreover, we  
482 have tested a putative role of the isoforms of  $\gamma$ - and  $\zeta$ -COP in regulating the size of COPI  
483 vesicles, but could not observe any significant difference (Fig. 3E). This leaves open the  
484 question as to the function(s) of COPI coat protein isoforms. One possibility is that the  
485 different isoforms of coatomer and Arf can transiently interact with various cytosolic or  
486 membrane proteins that are not captured in our assay. Likewise, additional cytosolic proteins  
487 may be required to modulate the content of COPI vesicles in concert with the coat protein  
488 isoforms (similar to a role attributed to GOLPH3 (Eckert et al., 2014), found at a low SILAC  
489 ratio 1.2 in vesicles made with  $\gamma_1\zeta_1$ -COPs). The only protein described to be an exclusive  $\gamma_2$ -  
490 COP interactor, Scyl1 (Hamlin et al., 2014), is a cytosolic protein. In our MS-analysis we did  
491 not detect Scyl1, independent of the conditions used.

492 Overall it seems possible that cargo capture specificity results from competition of different  
493 isoforms and is thus not observed when only one isoform is used for vesicle reconstitution.

494 Having experimentally excluded many basic functions for coatomer isoforms in mammalian  
495 cells, a remaining attractive possibility is that isoforms of  $\gamma$ -COP play a pivotal role during  
496 differentiation processes in other cell types (J. Bethune, personal communication).

497 Figure 6 represents a schematic model of a COPI vesicle based on our proteomic study. It  
498 has been previously established that COPI vesicles form at regions of the Golgi membrane  
499 with liquid disordered phase. They contain relatively less total sphingomyelin (SM) and  
500 cholesterol than their parental Golgi membranes, whereas the molecular species SM18:0 is  
501 significantly enriched (Brugger et al., 2000) due to specific binding to the vesicular type I  
502 transmembrane protein p24 (Contreras et al., 2012). On a protein level, COPI vesicles are  
503 enriched in p24/TMED-family proteins, ER-Golgi cycling proteins/receptors (e.g. ERGIC53  
504 and SURF4), ER-Golgi SNAREs (e.g. Stx5 and Sec22b), as well as the machinery to retrieve  
505 ER-residents (e.g. KDEL receptor and ERP44) (Fig. 6). Among the luminal proteins of COPI  
506 vesicles, NUCB1 and NUCB2 are highly abundant, present at a much higher concentration  
507 than KDEL-bearing ER-residents. Rather, these Ca-binding proteins occur in amounts about  
508 stoichiometric to the COPI membrane machinery proteins (Rutz et al., 2009). They likely  
509 interact with the luminal parts of membrane proteins to facilitate their uptake into vesicles  
510 (Fig. 6, indicated by black arrows). Whether secreted cargo can be found in COPI vesicles  
511 cannot be deduced from our proteomic study, possibly due to the generally low abundance of  
512 such proteins, as expected for cargo that undergoes non-signaled bulk uptake.

513 Apart from the aforementioned proteins, COPI vesicles carry factors for vesicle tethering  
514 (e.g. ZFPL1 and GOLGA5) and Golgi-resident transporters for small molecules across

515 membranes (e.g. SLC30A6 and SLC35E1). As expected, Golgi-resident enzymes were  
516 found enriched in the vesicles that serve glycosylation (e.g. GALNT1 and MAN1B1).  
517 Moreover, proteins that contribute to the formation of disulfide bonds (QSOX2) or have a less  
518 defined function (TM9SF1 and TM9SF3) are among the constituents that define the core of  
519 an intra-Golgi and Golgi-to-ER carrier (Fig. 6 and 5F).

520 On the cytoplasmic side, besides the various established binding partners of membrane  
521 attached coatomer, very few proteins seem to stably interact with COPI vesicles (also see  
522 previous sections). Proteins of the Rab family were the only cytosolic proteins identified  
523 under multiple conditions. Here, Rab18 was the most persistently identified family member  
524 (Fig. 6 and 5F).

525 Taken together, our results define the core proteome of COPI vesicles and reveal that the  
526 various isoforms of the COPI coat do not reflect functions in differential uptake of cargo (in  
527 line with an un-signaled uptake of cargo), and leave open a possibility that isoforms serve  
528 specific purposes during steps in development.

529 The presence of Ca-binding proteins in the vesicular lumen at concentrations stoichiometric  
530 to major membrane proteins (Rutz et al., 2009) hints at functions of NUCB1/2 in the  
531 molecular mechanism of cargo uptake or release in a pathway along a luminal calcium  
532 gradient, characteristic of the early secretory pathway (Pizzo et al., 2011).

533  
534

## 535 **Materials and Methods**

### 536 **Antibodies**

537 First antibodies used in this study: anti-calnexin (ab75801, Abcam, UK); anti-ERGIC53 (sc-  
538 365158, Santa Cruz Biotechnology, USA); anti-GM130 (610822, BD Biosciences, USA); anti-  
539  $\gamma$ R-COP (Pavel et al., 1998); anti-p24 (Gommel et al., 1999). Secondary antibodies used for  
540 western blot analysis: goat anti-mouse IgG Alexa Fluor 680 conjugated (A-21058, Thermo  
541 Fisher Scientific, USA); goat anti-rabbit AlexaFluor 680 conjugated (A-21076, Thermo Fisher  
542 Scientific, USA).

543

### 544 **Protein expression and purification**

545 Recombinant, myristoylated hArf paralogues (Arf1-Arf5) were expressed and purified based  
546 on previously established protocols (Popoff et al., 2011). Briefly, bacterial expression pellets  
547 usually originating from 4 liter of bacterial cultures were resuspended in 50 ml lysis buffer (50  
548 mM Tris-HCl pH 8.0, 1 mM MgCl<sub>2</sub>, 1 mM DTT, 1 mM GDP, 1 tablet cComplete™ EDTA-free  
549 Protease Inhibitor Cocktail [Roche, Switzerland]). Cells were lysed via 5 runs through a  
550 Microfluidizer® (Microfluidics, USA). The lysate was cleared of debris via centrifugation  
551 (100.000×g, 4°C, 1 h, TFT55-38 rotor [Kontron Instruments, Germany]) and Arf proteins were  
552 precipitated with ammonium sulfate at a final concentration of 40% over a course of 1.5 h.  
553 The precipitate was harvested (10.000×g, 4°C, 30 min, SLC-1500 rotor [Sorvall, USA]),  
554 resuspended in lysis buffer, and the Arf isoforms were further purified via a run over a  
555 Superdex75 (16/60) column (GE Healthcare, USA) equilibrated in storage buffer (25 mM  
556 HEPES pH 7.4 [KOH], 200 mM KCl, 5 mM MgCl<sub>2</sub>, 1 mM DTT, 1 mM, 10 % (w/v) glycerol).  
557 Recombinant murine coatomer containing different  $\gamma$ - and  $\zeta$ -COP isoforms was expressed in  
558 Sf9 insect cells. The heptameric complexes were purified via a One-STreP-Tag C-terminal of  
559 the  $\alpha$ -COP subunit with *Strep-Tactin*® Sepharose® (IBA, Germany).

560

### 561 **Cultivation of Cells**

562 HeLa, HepG2 and iMΦ cells were grown at 37°C with 5 % CO<sub>2</sub> in DMEM medium containing  
563 either Lys-8/Arg-10 (heavy) or Lys-0/Arg-0 (light), supplemented with 10 % fetal bovine  
564 serum (SILAC-Lys8-Arg10-Kit, Silantes, Germany).

565

### 566 **In vitro reconstitution of COPI vesicles**

567 Semi-intact cells for COPI reconstitution were prepared as previously described (Mancias  
568 and Goldberg, 2007). *In vitro* formation of COPI vesicles was essentially carried out as  
569 described by Adolf et al. (2013). Modifications for a standard budding reaction were the use  
570 of 200  $\mu$ g instead of 100  $\mu$ g of SIC in a volume of 200  $\mu$ l together with 4  $\mu$ g Arf and 10  $\mu$ g  
571 OST-coatomer. Reconstitution of COPI vesicles from rat liver Golgi was performed as  
572 described by Popoff et al. (2011).

573

### 574 **Preparation of HeLa cell cytosol**

575 Cells, nearly confluent, from 4-6 dishes ( $\varnothing$  15 cm) were trypsinized and resuspended in PBS  
576 supplemented with trypsin inhibitor. Cells were washed once with assay buffer (25 mM  
577 HEPES pH 7.2 [KOH], 150 mM KOAc, 2 mM MgOAc) and resuspended in a small volume (~1  
578 ml) of assay buffer. Lysis was achieved through nitrogen cavitation (800 psi, 30 min, on ice)  
579 using a 4639 cell disruption vessel (Parr Instruments, USA). The soluble cytosolic fraction  
580 was cleared from debris via centrifugation at 100.000×g within a TLA45/55 rotor (Beckman  
581 Coulter, USA) at 4°C for 1 h.

582

### 583 **Purification of COPI vesicles via floatation within an iodixanol gradient and MS sample 584 preparation**

585 COPI vesicle samples reconstituted as outlined above were adjusted to 40 % of iodixanol  
586 (Sigma-Aldrich, USA) in a final volume of 700  $\mu$ l and subsequently overlaid by first 1200  $\mu$ l  
587 of 30 % iodixanol solution and finally 400  $\mu$ l of 20 % iodixanol in assay buffer (25 mM HEPES  
588 pH 7.2 [KOH], 150 mM KOAc, 2 mM MgOAc). The density gradients were centrifuged for 13-  
589 15 h at 250.000×g in an SW60-Ti rotor (Beckman Coulter, USA). The top 200  $\mu$ l of the



590 gradient were discarded and a 500 µl vesicle-containing fraction was isolated. The vesicles  
591 were subsequently harvested by diluting the fraction 1:3 in assay buffer and subsequent  
592 centrifugation at 100.000×g in a TLA45/55 rotor (Beckman Coulter, USA) for 2 h at 4°C. The  
593 supernatant was again discarded and the samples dissolved in SDS sample buffer through  
594 boiling at 95°C for 10 min. For a single SILAC experiment, six budding- and control-reactions  
595 were performed in parallel from either heavy or light cells. The samples were mixed in a 1:1  
596 ratio and briefly run (approximately 1 cm) into a 10 % Tris-Glycine gel (Thermo Fisher  
597 Scientific, USA), stained with Roti®-Blue colloidal coomassie (Roth GmbH, Germany) and  
598 further processed for mass spectrometric analysis.

599

### 600 **Electron microscopy of reconstituted COPI vesicles**

601 For electron microscopic investigation, COPI vesicles, which have been reconstituted and  
602 purified as outlined above from SIC, were resin embedded as described by Adolf et al.  
603 (2013). Briefly, the yield from three gradients per sample was pooled, sequentially harvested  
604 at 100.000×g in a TLA45/55 rotor (Beckman Coulter, USA) for 1 h and further processed.  
605 COPI vesicles, which have been generated from rat liver Golgi, were negatively stained.

606

### 607 **Vesicle size determination**

608 COPI vesicle in electron microscopic images show a roughly circular shape. The area  
609 encircled by the membrane has inhomogeneous pixel intensities. Due to the significant noise  
610 and low contrast of the images, common circle detection-based and pixel classification-  
611 based segmentation methods are inadequate. Since the membrane profiles were consistent,  
612 we employed the segmentation method of Dimopoulos et al. (2014), which exploits the  
613 membrane patterns and can achieve an optimal detection of object boundaries(Dimopoulos  
614 et al., 2014).

615 In particular, we used a two-step semi-automatic segmentation scheme: i) positions of  
616 vesicles were manually localized to further use them for initialization or as seeds for the  
617 following segmentation step. Broken vesicles and similar structures were excluded. ii) The  
618 method described by Dimopoulos et al. (2014) was applied to segment the images based on  
619 membrane profiles obtained from a few vesicles as examples. The segmented vesicles with  
620 a low score of membrane profile were discarded to guarantee an accurate segmentation.  
621 The vesicle area was finally computed using the number of pixels in the segmented vesicle  
622 and the pixel size information.

623

### 624 **Mass spectrometry and data analysis**

625 Gel pieces were reduced with DTT, alkylated with iodoacetamide and digested with trypsin  
626 using the DigestPro MS platform (Intavis AG, Germany) following the protocol described by  
627 Shevchenko et al. (Shevchenko et al., 2006).

628 Peptides were analyzed by liquid chromatography–mass spectrometry (LCMS) using an  
629 UltiMate 3000 LC (Thermo Scientific, USA) coupled to either an Orbitrap Elite or a Q-  
630 Exactive mass spectrometer (Thermo Scientific, USA). Peptides analyzed by the Orbitrap  
631 Elite were loaded on a C18 Acclaim PepMap100 trap-column (Thermo Fisher Scientific,  
632 USA) with a flow rate of 30 µl/min 0.1 % TFA. Peptides were eluted and separated on an  
633 C18 Acclaim PepMap RSLC analytical column (75 µm x 250 mm) with a flow rate of 300  
634 nl/min in a 2 h gradient of 3 % buffer A (0.1 % formic acid, 1 % acetonitrile) to 40 % buffer B  
635 (0.1 % formic acid, 90 % acetonitrile). MS data were acquired with an automatic switch  
636 between a full scan and up to 30 data-dependent MS/MS scans.

637 Peptides analyzed on the Q-Exactive were directly injected to an analytical column (75 µm x  
638 300 mm), which was self-packed with 3 µm Reprosil Pur-AQ C18 material (Dr. Maisch HPLC  
639 GmbH, Germany) and separated using the same gradient as described before. MS data  
640 were acquired with an automatic switch between a full scan and up to 15 data-dependent  
641 MS/MS scans.

642 Data analysis was carried out with MaxQuant version 1.5.3.8 (Cox and Mann, 2008) using  
643 standard settings for each instrument type and searched against a human or mouse specific  
644 database extracted from UniProt (UniProt Consortium). Carbamidomethylation of cysteine  
645 was specified as fixed modification; oxidation of methionine, deamidation of asparagine or

646 glutamine and acetylation of protein N-termini was set as variable modification. 'Requantify'  
647 as well as 'Match Between Runs' options were both enabled.  
648 Results were filtered for a 1 % false discovery rate (FDR) on peptide spectrum match (PSM)  
649 and protein level. MaxQuant output files were further processed and filtered using self-  
650 compiled R-scripts and Excel (Microsoft, USA).  
651

652 **Author contributions**

653  
654 MR performed all reconstitutions with recombinant proteins and purification of SIC derived  
655 vesicles. BH performed MS experiments, QG analyzed EM-images for vesicle size  
656 determinations, AH performed electron microscopy experiments. FA and FW supervised  
657 coworkers, and MR and FW wrote the manuscript. All authors revised the manuscript.

658  
659 **Acknowledgements**

660  
661 We wish to thank all members of the Wieland lab for helpful comments, fruitful discussions,  
662 and their support. We would further like to thank Eicke Latz (Institute of Innate Immunity,  
663 Bonn) for kindly providing immortalized macrophages and Julien Béthune for critical reading  
664 of the manuscript. We are grateful to Hilmar Bading (Department of Neurobiology and  
665 Interdisciplinary Center for Neurosciences, Heidelberg) for providing the opportunity to carry  
666 out the electron microscopy work in his laboratory. This work was supported by the German  
667 Research Council, SFB 638, A10 and DFG-Einzelprojekt Wi-654/12-1.  
668

669 **Supplementary Material**

670  
671 **Proteomics Data**

672 Tables T1-T12 contain comprehensive overviews of the mass spectrometric data that is  
673 referred to in the text. The identified proteins, their corresponding gene names and SILAC  
674 ratios are given in T1-T8. Table 11 shows the comparison of the top scoring proteins from  
675 HeLa (T1), HepG2 (T7), and iMΦ (T8). A comparison of the COPI proteomes of vesicles  
676 made with different isoforms of Arf (T1, T4-6) is shown in table 12. Detailed information on all  
677 peptides and proteins identified in this study can be found in T13-T16.  
678

679 **Control experiments to assess an influence of non-hydrolyzable GTP analogs on the  
680 release of material from SIC**

681 In experiments to analyze possible COPI interactors present in cytosol, the non-hydrolyzable  
682 GTP analog GTPγS was used in order to stabilize the vesicular coat.  
683 Under these conditions, we detected many membrane proteins of the ER released from SIC,  
684 as compared to COPI vesicle formation with GTP. Therefore we decided to probe the cytosol  
685 used for the presence of the highly abundant ER marker calnexin and the ERGIC/cis-Golgi  
686 proteins ERGIC53 and p24. None of the proteins could be detected (Fig. S1A). Thus we  
687 excluded the cytosol as source of the membrane proteins released with GTPγS. Expectedly,  
688 soluble cytosolic proteins (Arf1, ε-COP) as well also soluble ER-content (BiP/GRP78)  
689 partitioned with the cytosolic fraction (Fig. S1A). Hence, we tested whether the use of GTPγS  
690 alone would lead to the release of early secretory pathway membrane proteins. In a  
691 reconstitution reaction with GTPγS in the presence of cytosol, but without recombinant  
692 coatomer, we again detected a large number of ER proteins. Of the 38 most-enriched  
693 proteins, 33 are also found among the 70 proteins with the highest SILAC-ratios in the  
694 sample with coatomer (Fig. S1B and C and Suppl. Tab. 10). We conclude that incubation of  
695 semi-intact cells with GTPγS and cytosol causes partial fragmentation of the ER.  
696  
697

698 **Figure Legends**

699

700 **Fig. 1: *In vitro* reconstitution and purification of COPI vesicles from semi-intact cells**

701 **(SIC)**  
702 A) Schematic of COPI vesicle *in vitro* reconstitution from SIC. Cells are permeabilized with  
703 digitonin and incubated with recombinant coatomer, Arf1, and guanine-nucleotide. Vesicles  
704 are separated from their donor membranes by centrifugation (see Methods section).

705 B) Iodixanol density gradient for floatation of COPI vesicles. Schematic of the gradient used  
706 for vesicle floatation showing the different concentrations of the density matrix. The red arrow  
707 indicates fractionation from top to bottom.

708 C) Analysis of fractions from iodixanol gradients. Ten fractions were taken from top (1) to  
709 bottom (10) and analyzed for the presence of the COPI marker proteins p24, ERGIC53 and  
710 the coatomer subunit  $\gamma$ -COP by western blotting. The black box highlights the fractions that  
711 contain COPI vesicles.

712 D) Electron microscopic images of resin-embedded, COPI vesicles, which have been  
713 reconstituted *in vitro* either with GTP or GMP-PNP and then purified by floatation within an  
714 iodixanol gradient (Fractions 2+3).

715

716 **Fig. 2: The SILAC-based core-proteome of *in vitro* reconstituted COPI vesicles**

717 A) Work-flow of a COPI proteomic experiment. After labeling cells with heavy amino acids (i),  
718 vesicles are reconstituted and purified via floatation. In parallel, a control reaction (without  
719 CM) is performed from non-labeled cells (ii). COPI vesicle containing and control samples  
720 are isolated from the gradients, mixed 1:1 and processed (iii) to analyze both samples within  
721 the same MS run (iv) (see Methods section).

722 B) Scatter plot representing two independent experiments as outlined in A). Experiments  
723 were performed with switched labels.

724 C) Table of the 100 highest-scoring candidates obtained from a direct comparison of COPI  
725 vesicles with a mock reaction. Gene names, mean SILAC ratios, and standard errors of the  
726 mean (SEM) obtained from two to three experiments are shown. The few proteins with no  
727 SEM displayed were identified solely in one experiment in which the vesicle sample was  
728 produced from isotope-labeled cells.

729

730 **Fig. 3: Comparison of isotopic COPI vesicles**

731 A) Recombinant coatomer used in this study. Coomassie-stained gel of recombinant  
732 coatomer containing  $\gamma_1$ - $\zeta_1$ -COP,  $\gamma_1$ - $\zeta_2$ -COP, or  $\gamma_2$ - $\zeta_1$ -COP. Subunits and apparent molecular  
733 masses are indicated.

734 B) Representation in % of protein identity of  $\gamma$ - and  $\zeta$ -COP isoforms (top) and alignment of  
735 the N-terminal region of  $\zeta_1$ - and  $\zeta_2$ -COP (bottom).

736 C) Example of a scatter plot representing two independent experiments of a direct  
737 comparison of isotopic COPI vesicles. The example shows reconstitutions with  $\gamma_1$ - $\zeta_1$ -COP-  
738 versus  $\gamma_2$ - $\zeta_1$ -COP containing-coatomer. Experiments were performed with switched labels.  
739 Scatter plots from further comparisons of isotopic vesicles are depicted in Supplemental  
740 Material, Fig. S2A-C.

741 D) Top 25 scoring proteins, their SILAC ratios, and standard errors of the mean (SEM) as  
742 obtained from two direct comparisons of COPI vesicles produced with different  $\gamma$ - and  $\zeta$ -COP  
743 isoforms. Gene names, mean SILAC ratios, and SEM obtained from two experiments are  
744 shown. The few proteins with no SEM displayed were identified solely in the experiment  
745 where the respective vesicle sample was produced from isotope-labeled cells.

746 E) Table showing the sizes of COPI vesicles generated *in vitro* with single isotopes of  
747 coatomer or an endogenous mixture of all isotopes (whole CM from rat liver).

748

749 **Fig. 4: Comparison of COPI vesicles generated with various Arf isoforms**

750 A) Recombinant Arf proteins used in this study. Coomassie-stained gel with recombinant  
751 Arf1, Arf3, Arf4, and Arf5. Subunits and apparent molecular masses indicated.

752 B-D) Scatter plot representing two independent comparisons of COPI vesicles made with  
753 Arf3, Arf4, or Arf5 with mock reactions. Experiments were performed with switched labels.



754 E) Top 25 scoring candidates, their mean SILAC ratios and standard errors of the mean  
755 (SEM) as obtained from two direct comparisons of COPI vesicles produced with the indicated  
756 Arf isoforms versus a control without coatomer. Gene names, mean SILAC ratios, and SEM  
757 obtained from two experiments are shown. The few proteins with no SEM displayed were  
758 identified solely in the experiment where the vesicle sample was produced from isotope-  
759 labeled cells.

760 F) Venn-diagram displaying the overlap of proteins enriched >twofold in COPI vesicles made  
761 with various isoforms of Arf.

762

763 **Fig. 5: Comparison of protein compositions of COPI vesicles of various cell types**

764 A) and B) Scatter plots representing two independent experiments that compare COPI  
765 vesicles reconstituted from HepG2 (A) or iMΦ (B) cells with a mock reaction. Experiments  
766 were performed with switched labels.

767 C) and D) The top 50 scoring proteins within the HepG2 COPI proteome (C) or of iMΦ (D).  
768 Gene names, mean SILAC ratios, and standard errors of the mean (SEM) obtained from two  
769 experiments are shown. The few proteins with no SEM displayed were identified solely in the  
770 experiment where the vesicle sample was produced from isotope-labeled cells.

771 E) Venn-diagram displaying the overlap of proteins that are >twofold enriched in HeLa (122  
772 proteins), HepG2 (69 proteins), and iMΦ cells (144 proteins).

773 F) List of the 39 proteins found >twofold enriched in all three mammalian cell lines (HeLa,  
774 HepG2, and iMΦ).

775

776 **Fig. 6: Model of a COP vesicle with its core components**

777 Schematic representation of a COPI vesicle with its core proteome based on our SILAC  
778 proteomics data (Fig. 5F). For description and discussion please refer to the Conclusion  
779 section of the main text.

780

781 **Fig. S1: Comparison of material released from SIC in the presence of GTPγS or GTP**

782 A) Western blot analysis of semi-intact HeLa cells (SIC), HeLa cell lysate and cytosol for the  
783 presence of the proteins indicated.

784 B) The top 72 scoring proteins (SILAC ratios of >2) from a comparison of COPI vesicles  
785 reconstituted with GTPγS or GTP in the presence of cytosol. Gene names, mean SILAC  
786 ratios, and standard errors of the mean (SEM) obtained from two independent experiments  
787 are shown. The few proteins with no SEM displayed were identified solely in the experiment  
788 where the GTPγS vesicle sample was produced from isotope-labeled cells. Gene names of  
789 proteins also found in C) are red.

790 C) Proteins scoring SILAC ratios of >2 from samples released from SIC by cytosol, Arf1, and  
791 GTPγS or GTP. Gene names, mean SILAC ratios, and SEM as obtained from two  
792 independent experiments are shown. The few proteins with no SEM displayed were identified  
793 solely in one experiment where the GTPγS sample was produced from isotope-labeled cells.  
794 Gene names of proteins also found in B) are red.

795

796 **Fig. S2: Further comparisons of isotopic COPI vesicles**

797 A-C) Scatter plots representing two independent experiments of a direct comparison of  
798 isotopic COPI vesicles indicated. Experiments were performed with switched labels.

799

800 **Fig. S3: Different coatomer isoforms produce COPI vesicles of similar size**

801 A-D) Representative electron microscopic image of negatively stained COPI vesicles  
802 reconstituted with different isoforms of coatomer from rat liver Golgi.

803 E) Determination of vesicle diameters as described in Materials and Methods. Structures  
804 taken into account are colored in green.

805 F) Mask of the segmented vesicles shown in E).

806

## 807 References

- 808
- 809 Adolf, F., Herrmann, A., Hellwig, A., Beck, R., Brügger, B., and Wieland, F.T. (2013). Scission of COPI
- 810 and COPII vesicles is independent of GTP hydrolysis. *Traffic* 14, 922-932.
- 811 Adolf, F., Rhiel, M., Reckmann, I., and Wieland, F.T. (2016). Sec24C/D-isoform-specific sorting of the
- 812 preassembled ER-Golgi Q-SNARE complex. *Mol Biol Cell* 27, 2697-2707.
- 813 Antonny, B., Beraud-Dufour, S., Chardin, P., and Chabre, M. (1997). N-terminal hydrophobic residues
- 814 of the G-protein ADP-ribosylation factor-1 insert into membrane phospholipids upon GDP to GTP
- 815 exchange. *Biochemistry* 36, 4675-4684.
- 816 Bard, F., and Malhotra, V. (2006). The formation of TGN-to-plasma-membrane transport carriers.
- 817 *Annu Rev Cell Dev Biol* 22, 439-455.
- 818 Barlowe, C., d'Enfert, C., and Schekman, R. (1993). Purification and characterization of SAR1p, a small
- 819 GTP-binding protein required for transport vesicle formation from the endoplasmic reticulum. *J Biol*
- 820 *Chem* 268, 873-879.
- 821 Barlowe, C., Orci, L., Yeung, T., Hosobuchi, M., Hamamoto, S., Salama, N., Rexach, M.F., Ravazzola,
- 822 M., Amherdt, M., and Schekman, R. (1994). COPII: a membrane coat formed by Sec proteins that
- 823 drive vesicle budding from the endoplasmic reticulum. *Cell* 77, 895-907.
- 824 Bethune, J., and Wieland, F.T. (2018). Assembly of COPI and COPII Vesicular Coat Proteins on
- 825 Membranes. *Annu Rev Biophys*.
- 826 Bi, X., Corpina, R.A., and Goldberg, J. (2002). Structure of the Sec23/24-Sar1 pre-budding complex of
- 827 the COPII vesicle coat. *Nature* 419, 271-277.
- 828 Bobak, D.A., Nightingale, M.S., Murtagh, J.J., Price, S.R., Moss, J., and Vaughan, M. (1989). Molecular
- 829 cloning, characterization, and expression of human ADP-ribosylation factors: two guanine nucleotide-
- 830 dependent activators of cholera toxin. *Proc Natl Acad Sci U S A* 86, 6101-6105.
- 831 Bonifacino, J.S. (2004). The GGA proteins: adaptors on the move. *Nat Rev Mol Cell Biol* 5, 23-32.
- 832 Bonnon, C., Wendeler, M.W., Paccaud, J.P., and Hauri, H.P. (2010). Selective export of human GPI-
- 833 anchored proteins from the endoplasmic reticulum. *J Cell Sci* 123, 1705-1715.
- 834 Borner, G.H.H., Rana, A.A., Harbour, M., Forster, R., Lilley, K.S., Smith, J.C., and Robinson, M.S. (2006).
- 835 Proteomic analysis of clathrin-coated vesicles. *European Journal of Cell Biology* 85, 70-70.
- 836 Bremser, M., Nickel, W., Schweikert, M., Ravazzola, M., Amherdt, M., Hughes, C.A., Söllner, T.H.,
- 837 Rothman, J.E., and Wieland, F.T. (1999). Coupling of coat assembly and vesicle budding to packaging
- 838 of putative cargo receptors. *Cell* 96, 495-506.
- 839 Brügger, B., Sandhoff, R., Wegehingel, S., Gorgas, K., Malsam, J., Helms, J.B., Lehmann, W.D., Nickel,
- 840 W., and Wieland, F.T. (2000). Evidence for segregation of sphingomyelin and cholesterol during
- 841 formation of COPI-coated vesicles. *J Cell Biol* 151, 507-518.
- 842 Cavenagh, M.M., Whitney, J.A., Carroll, K., Zhang, C., Boman, A.L., Rosenwald, A.G., Mellman, I., and
- 843 Kahn, R.A. (1996). Intracellular distribution of Arf proteins in mammalian cells. Arf6 is uniquely
- 844 localized to the plasma membrane. *J Biol Chem* 271, 21767-21774.
- 845 Contreras, F.X., Ernst, A.M., Haberkant, P., Bjorkholm, P., Lindahl, E., Gonen, B., Tischer, C., Elofsson,
- 846 A., von Heijne, G., Thiele, C., *et al.* (2012). Molecular recognition of a single sphingolipid species by a
- 847 protein's transmembrane domain. *Nature* 481, 525-529.
- 848 Cosson, P., Lefkir, Y., Démollière, C., and Letourneur, F. (1998). New COP1-binding motifs involved in
- 849 ER retrieval. *EMBO J* 17, 6863-6870.
- 850 Cox, J., and Mann, M. (2008). MaxQuant enables high peptide identification rates, individualized
- 851 p.p.b.-range mass accuracies and proteome-wide protein quantification. *Nat Biotechnol* 26, 1367-
- 852 1372.
- 853 Dejgaard, S.Y., Murshid, A., Erman, A., Kizilay, O., Verbich, D., Lodge, R., Dejgaard, K., Ly-Hartig, T.B.,
- 854 Pepperkok, R., Simpson, J.C., *et al.* (2008). Rab18 and Rab43 have key roles in ER-Golgi trafficking. *J*
- 855 *Cell Sci* 121, 2768-2781.
- 856 Dimopoulos, S., Mayer, C.E., Rudolf, F., and Stelling, J. (2014). Accurate cell segmentation in
- 857 microscopy images using membrane patterns. *Bioinformatics* 30, 2644-2651.
- 858 Dodonova, S.O., Aderhold, P., Kopp, J., Ganeva, I., Rohling, S., Hagen, W.J.H., Sinning, I., Wieland, F.,
- 859 and Briggs, J.A.G. (2017). 9A structure of the COPI coat reveals that the Arf1 GTPase occupies two

860 contrasting molecular environments. *Elife* 6.  
861 Dodonova, S.O., Diestelkoetter-Bachert, P., von Appen, A., Hagen, W.J., Beck, R., Beck, M., Wieland,  
862 F., and Briggs, J.A. (2015). VESICULAR TRANSPORT. A structure of the COPI coat and the role of coat  
863 proteins in membrane vesicle assembly. *Science* 349, 195-198.  
864 Donaldson, J.G., Cassel, D., Kahn, R.A., and Klausner, R.D. (1992). ADP-ribosylation factor, a small  
865 GTP-binding protein, is required for binding of the coatomer protein beta-COP to Golgi membranes.  
866 *Proc Natl Acad Sci U S A* 89, 6408-6412.  
867 Dunkley, T.P., Watson, R., Griffin, J.L., Dupree, P., and Lilley, K.S. (2004). Localization of organelle  
868 proteins by isotope tagging (LOPIT). *Mol Cell Proteomics* 3, 1128-1134.  
869 Eckert, E.S., Reckmann, I., Hellwig, A., Röhling, S., El-Battari, A., Wieland, F.T., and Popoff, V. (2014).  
870 Golgi phosphoprotein 3 triggers signal-mediated incorporation of glycosyltransferases into coatomer-  
871 coated (COPI) vesicles. *J Biol Chem* 289, 31319-31329.  
872 Eugster, A., Frigerio, G., Dale, M., and Duden, R. (2000). COP I domains required for coatomer  
873 integrity, and novel interactions with ARF and ARF-GAP. *EMBO J* 19, 3905-3917.  
874 Foster, L.J., de Hoog, C.L., Zhang, Y., Zhang, Y., Xie, X., Mootha, V.K., and Mann, M. (2006). A  
875 mammalian organelle map by protein correlation profiling. *Cell* 125, 187-199.  
876 Franco, M., Chardin, P., Chabre, M., and Paris, S. (1995). Myristoylation of ADP-ribosylation factor 1  
877 facilitates nucleotide exchange at physiological Mg<sup>2+</sup> levels. *J Biol Chem* 270, 1337-1341.  
878 Futatsumori, M., Kasai, K., Takatsu, H., Shin, H.W., and Nakayama, K. (2000). Identification and  
879 characterization of novel isoforms of COP I subunits. *J Biochem* 128, 793-801.  
880 Gilchrist, A., Au, C.E., Hiding, J., Bell, A.W., Fernandez-Rodriguez, J., Lesimple, S., Nagaya, H., Roy, L.,  
881 Gosline, S.J., Hallett, M., *et al.* (2006). Quantitative proteomics analysis of the secretory pathway. *Cell*  
882 127, 1265-1281.  
883 Gommel, D., Orci, L., Emig, E.M., Hannah, M.J., Ravazzola, M., Nickel, W., Helms, J.B., Wieland, F.T.,  
884 and Sohn, K. (1999). p24 and p23, the major transmembrane proteins of COPI-coated transport  
885 vesicles, form hetero-oligomeric complexes and cycle between the organelles of the early secretory  
886 pathway. *FEBS Lett* 447, 179-185.  
887 Hamlin, J.N., Schroeder, L.K., Fotouhi, M., Dokainish, H., Ioannou, M.S., Girard, M., Summerfeldt, N.,  
888 Melançon, P., and McPherson, P.S. (2014). Scyl1 scaffolds class II Arfs to specific subcomplexes of  
889 coatomer through the  $\gamma$ -COP appendage domain. *J Cell Sci* 127, 1454-1463.  
890 Hara-Kuge, S., Kuge, O., Orci, L., Amherdt, M., Ravazzola, M., Wieland, F.T., and Rothman, J.E. (1994).  
891 En bloc incorporation of coatomer subunits during the assembly of COP-coated vesicles. *J Cell Biol*  
892 124, 883-892.  
893 Hirst, J., Borner, G.H., Antrobus, R., Peden, A.A., Hodson, N.A., Sahlender, D.A., and Robinson, M.S.  
894 (2012). Distinct and overlapping roles for AP-1 and GGAs revealed by the "knocksideways" system.  
895 *Curr Biol* 22, 1711-1716.  
896 Hong, W., and Lev, S. (2014). Tethering the assembly of SNARE complexes. *Trends Cell Biol* 24, 35-43.  
897 Hutagalung, A.H., and Novick, P.J. (2011). Role of Rab GTPases in membrane traffic and cell  
898 physiology. *Physiol Rev* 91, 119-149.  
899 Itzhak, D.N., Tyanova, S., Cox, J., and Borner, G.H. (2016). Global, quantitative and dynamic mapping  
900 of protein subcellular localization. *Elife* 5.  
901 Kahn, R.A., Cherfils, J., Elias, M., Lovering, R.C., Munro, S., and Schurmann, A. (2006). Nomenclature  
902 for the human Arf family of GTP-binding proteins: ARF, ARL, and SAR proteins. *J Cell Biol* 172, 645-  
903 650.  
904 Kahn, R.A., Kern, F.G., Clark, J., Gelmann, E.P., and Rulka, C. (1991). Human ADP-ribosylation factors.  
905 A functionally conserved family of GTP-binding proteins. *J Biol Chem* 266, 2606-2614.  
906 Kawamoto, K., Yoshida, Y., Tamaki, H., Torii, S., Shinotsuka, C., Yamashina, S., and Nakayama, K.  
907 (2002). GBF1, a guanine nucleotide exchange factor for ADP-ribosylation factors, is localized to the  
908 cis-Golgi and involved in membrane association of the COPI coat. *Traffic* 3, 483-495.  
909 Lin, P., Le-Niculescu, H., Hofmeister, R., McCaffery, J.M., Jin, M., Hennemann, H., McQuistan, T., De  
910 Vries, L., and Farquhar, M.G. (1998). The mammalian calcium-binding protein, nucleobindin  
911 (CALNUC), is a Golgi resident protein. *J Cell Biol* 141, 1515-1527.

- 912 Malhotra, V., Serafini, T., Orci, L., Shepherd, J.C., and Rothman, J.E. (1989). Purification of a novel  
913 class of coated vesicles mediating biosynthetic protein transport through the Golgi stack. *Cell* 58,  
914 329-336.
- 915 Malsam, J., Satoh, A., Pelletier, L., and Warren, G. (2005). Golgin tethers define subpopulations of  
916 COPI vesicles. *Science* 307, 1095-1098.
- 917 Mancias, J.D., and Goldberg, J. (2007). The transport signal on Sec22 for packaging into COPII-coated  
918 vesicles is a conformational epitope. *Mol Cell* 26, 403-414.
- 919 Mancias, J.D., and Goldberg, J. (2008). Structural basis of cargo membrane protein discrimination by  
920 the human COPII coat machinery. *EMBO J* 27, 2918-2928.
- 921 Matsuoka, K., Orci, L., Amherdt, M., Bednarek, S.Y., Hamamoto, S., Schekman, R., and Yeung, T.  
922 (1998). COPII-coated vesicle formation reconstituted with purified coat proteins and chemically  
923 defined liposomes. *Cell* 93, 263-275.
- 924 McMahon, H.T., and Mills, I.G. (2004). COP and clathrin-coated vesicle budding: different pathways,  
925 common approaches. *Curr Opin Cell Biol* 16, 379-391.
- 926 Moelleken, J., Malsam, J., Betts, M.J., Movafeghi, A., Reckmann, I., Meissner, I., Hellwig, A., Russell,  
927 R.B., Söllner, T., Brügger, B., *et al.* (2007). Differential localization of coatomer complex isoforms  
928 within the Golgi apparatus. *Proc Natl Acad Sci U S A* 104, 4425-4430.
- 929 Munro, S., and Pelham, H.R. (1987). A C-terminal signal prevents secretion of luminal ER proteins.  
930 *Cell* 48, 899-907.
- 931 Ong, S.E., Blagoev, B., Kratchmarova, I., Kristensen, D.B., Steen, H., Pandey, A., and Mann, M. (2002).  
932 Stable isotope labeling by amino acids in cell culture, SILAC, as a simple and accurate approach to  
933 expression proteomics. *Mol Cell Proteomics* 1, 376-386.
- 934 Orci, L., Glick, B.S., and Rothman, J.E. (1986). A new type of coated vesicular carrier that appears not  
935 to contain clathrin: its possible role in protein transport within the Golgi stack. *Cell* 46, 171-184.
- 936 Orci, L., Malhotra, V., Amherdt, M., Serafini, T., and Rothman, J.E. (1989). Dissection of a single round  
937 of vesicular transport: sequential intermediates for intercisternal movement in the Golgi stack. *Cell*  
938 56, 357-368.
- 939 Orci, L., Palmer, D.J., Ravazzola, M., Perrelet, A., Amherdt, M., and Rothman, J.E. (1993). Budding  
940 from Golgi membranes requires the coatomer complex of non-clathrin coat proteins. *Nature* 362,  
941 648-652.
- 942 Pavel, J., Harter, C., and Wieland, F.T. (1998). Reversible dissociation of coatomer: functional  
943 characterization of a beta/delta-coat protein subcomplex. *Proc Natl Acad Sci U S A* 95, 2140-2145.
- 944 Pizzo, P., Lissandron, V., Capitanio, P., and Pozzan, T. (2011). Ca(2+) signalling in the Golgi apparatus.  
945 *Cell Calcium* 50, 184-192.
- 946 Popoff, V., Langer, J.D., Reckmann, I., Hellwig, A., Kahn, R.A., Brügger, B., and Wieland, F.T. (2011).  
947 Several ADP-ribosylation factor (Arf) isoforms support COPI vesicle formation. *J Biol Chem* 286,  
948 35634-35642.
- 949 Price, S.R., Nightingale, M., Tsai, S.C., Williamson, K.C., Adamik, R., Chen, H.C., Moss, J., and Vaughan,  
950 M. (1988). Guanine nucleotide-binding proteins that enhance cholera toxin ADP-ribosyltransferase  
951 activity: nucleotide and deduced amino acid sequence of an ADP-ribosylation factor cDNA. *Proc Natl*  
952 *Acad Sci U S A* 85, 5488-5491.
- 953 Pryer, N.K., Wuestehube, L.J., and Schekman, R. (1992). Vesicle-mediated protein sorting. *Annu Rev*  
954 *Biochem* 61, 471-516.
- 955 Robinson, D.G., and Pimpl, P. (2014). Clathrin and post-Golgi trafficking: a very complicated issue.  
956 *Trends Plant Sci* 19, 134-139.
- 957 Robinson, M.S. (2015). Forty Years of Clathrin-coated Vesicles. *Traffic* 16, 1210-1238.
- 958 Rutz, C., Satoh, A., Ronchi, P., Brügger, B., Warren, G., and Wieland, F.T. (2009). Following the fate in  
959 vivo of COPI vesicles generated in vitro. *Traffic* 10, 994-1005.
- 960 Sahlmuller, M.C., Strating, J.R., Beck, R., Eckert, P., Popoff, V., Haag, M., Hellwig, A., Berger, I.,  
961 Brügger, B., and Wieland, F.T. (2011). Recombinant heptameric coatomer complexes: novel tools to  
962 study isoform-specific functions. *Traffic* 12, 682-692.
- 963 Schindler, R., Itin, C., Zerial, M., Lottspeich, F., and Hauri, H.P. (1993). ERGIC-53, a membrane protein  
964 of the ER-Golgi intermediate compartment, carries an ER retention motif. *Eur J Cell Biol* 61, 1-9.



965 Serafini, T., Orci, L., Amherdt, M., Brunner, M., Kahn, R.A., and Rothman, J.E. (1991). ADP-ribosylation  
966 factor is a subunit of the coat of Golgi-derived COP-coated vesicles: a novel role for a GTP-binding  
967 protein. *Cell* 67, 239-253.

968 Shevchenko, A., Tomas, H., Havlis, J., Olsen, J.V., and Mann, M. (2006). In-gel digestion for mass  
969 spectrometric characterization of proteins and proteomes. *Nat Protoc* 1, 2856-2860.

970 Sohn, K., Orci, L., Ravazzola, M., Amherdt, M., Bremser, M., Lottspeich, F., Fiedler, K., Helms, J.B., and  
971 Wieland, F.T. (1996). A major transmembrane protein of Golgi-derived COPI-coated vesicles involved  
972 in coatomer binding. *J Cell Biol* 135, 1239-1248.

973 Spang, A., Matsuoka, K., Hamamoto, S., Schekman, R., and Orci, L. (1998). Coatomer, Arf1p, and  
974 nucleotide are required to bud coat protein complex I-coated vesicles from large synthetic  
975 liposomes. *Proc Natl Acad Sci U S A* 95, 11199-11204.

976 Stamnes, M.A., and Rothman, J.E. (1993). The binding of AP-1 clathrin adaptor particles to Golgi  
977 membranes requires ADP-ribosylation factor, a small GTP-binding protein. *Cell* 73, 999-1005.

978 Sun, Z., Anderl, F., Fröhlich, K., Zhao, L., Hanke, S., Brügger, B., Wieland, F., and Béthune, J. (2007).  
979 Multiple and stepwise interactions between coatomer and ADP-ribosylation factor-1 (Arf1)-GTP.  
980 *Traffic* 8, 582-593.

981 Takamori, S., Holt, M., Stenius, K., Lemke, E.A., Gronborg, M., Riedel, D., Urlaub, H., Schenck, S.,  
982 Brugger, B., Ringler, P., *et al.* (2006). Molecular anatomy of a trafficking organelle. *Cell* 127, 831-846.

983 Traub, L.M., Ostrom, J.A., and Kornfeld, S. (1993). Biochemical dissection of AP-1 recruitment onto  
984 Golgi membranes. *J Cell Biol* 123, 561-573.

985 Tsuchiya, M., Price, S.R., Tsai, S.C., Moss, J., and Vaughan, M. (1991). Molecular identification of ADP-  
986 ribosylation factor mRNAs and their expression in mammalian cells. *J Biol Chem* 266, 2772-2777.

987 Volpicelli-Daley, L.A., Li, Y., Zhang, C.J., and Kahn, R.A. (2005). Isoform-selective effects of the  
988 depletion of ADP-ribosylation factors 1-5 on membrane traffic. *Mol Biol Cell* 16, 4495-4508.

989 Waters, M.G., Serafini, T., and Rothman, J.E. (1991). 'Coatomer': a cytosolic protein complex  
990 containing subunits of non-clathrin-coated Golgi transport vesicles. *Nature* 349, 248-251.

991 Wegmann, D., Hess, P., Baier, C., Wieland, F.T., and Reinhard, C. (2004). Novel isotypic gamma/zeta  
992 subunits reveal three coatomer complexes in mammals. *Mol Cell Biol* 24, 1070-1080.

993 Wieland, F.T., Gleason, M.L., Serafini, T.A., and Rothman, J.E. (1987). The rate of bulk flow from the  
994 endoplasmic reticulum to the cell surface. *Cell* 50, 289-300.

995 Wilson, C., Venditti, R., Rega, L.R., Colanzi, A., D'Angelo, G., and De Matteis, M.A. (2011). The Golgi  
996 apparatus: an organelle with multiple complex functions. *Biochem J* 433, 1-9.

997 Wilson, D.W., Lewis, M.J., and Pelham, H.R. (1993). pH-dependent binding of KDEL to its receptor in  
998 vitro. *J Biol Chem* 268, 7465-7468.

999 Wong, M., and Munro, S. (2014). Membrane trafficking. The specificity of vesicle traffic to the Golgi is  
1000 encoded in the golgin coiled-coil proteins. *Science* 346, 1256898.

1001 Woo, C.H., Gao, C., Yu, P., Tu, L., Meng, Z., Banfield, D.K., Yao, X., and Jiang, L. (2015). Conserved  
1002 function of the lysine-based KXD/E motif in Golgi retention for endomembrane proteins among  
1003 different organisms. *Mol Biol Cell* 26, 4280-4293.

1004 Zhao, L., Helms, J.B., Brügger, B., Harter, C., Martoglio, B., Graf, R., Brunner, J., and Wieland, F.T.  
1005 (1997). Direct and GTP-dependent interaction of ADP ribosylation factor 1 with coatomer subunit  
1006 beta. *Proc Natl Acad Sci U S A* 94, 4418-4423.

1007 Zhao, X., Lasell, T.K., and Melançon, P. (2002). Localization of large ADP-ribosylation factor-guanine  
1008 nucleotide exchange factors to different Golgi compartments: evidence for distinct functions in  
1009 protein traffic. *Mol Biol Cell* 13, 119-133.

1010

Figure 1

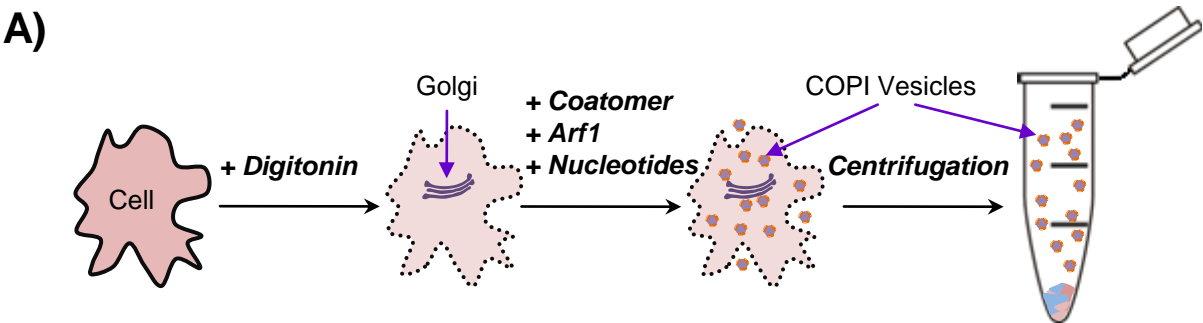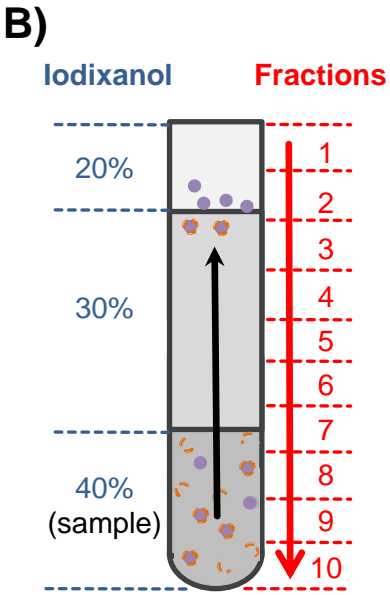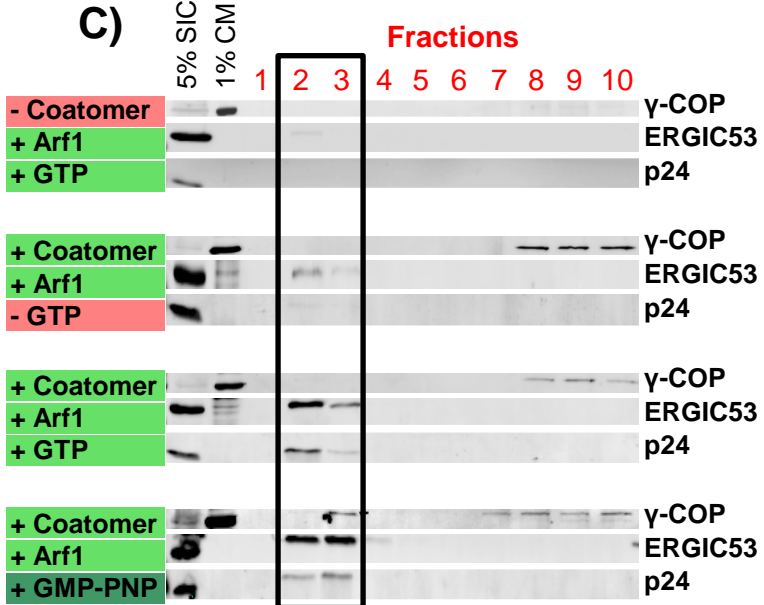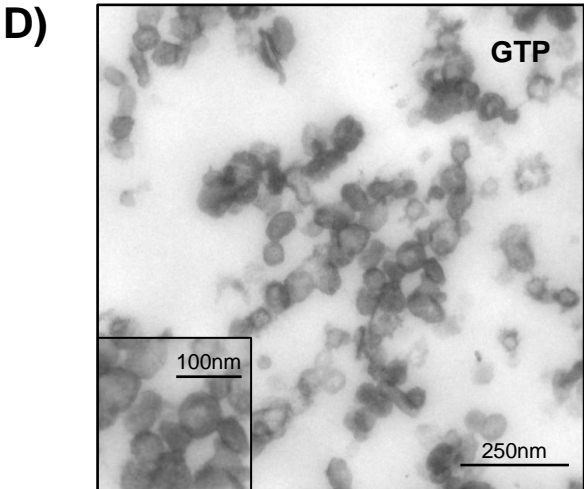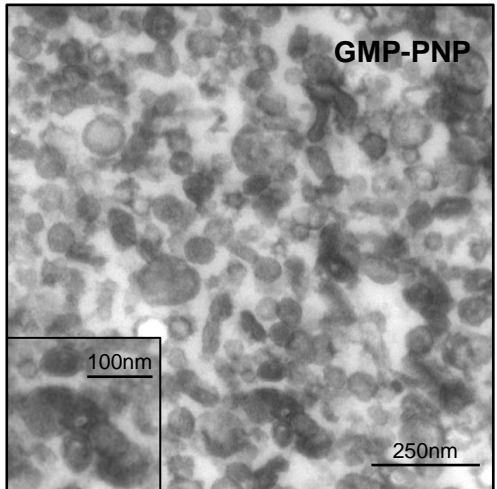

Figure 2

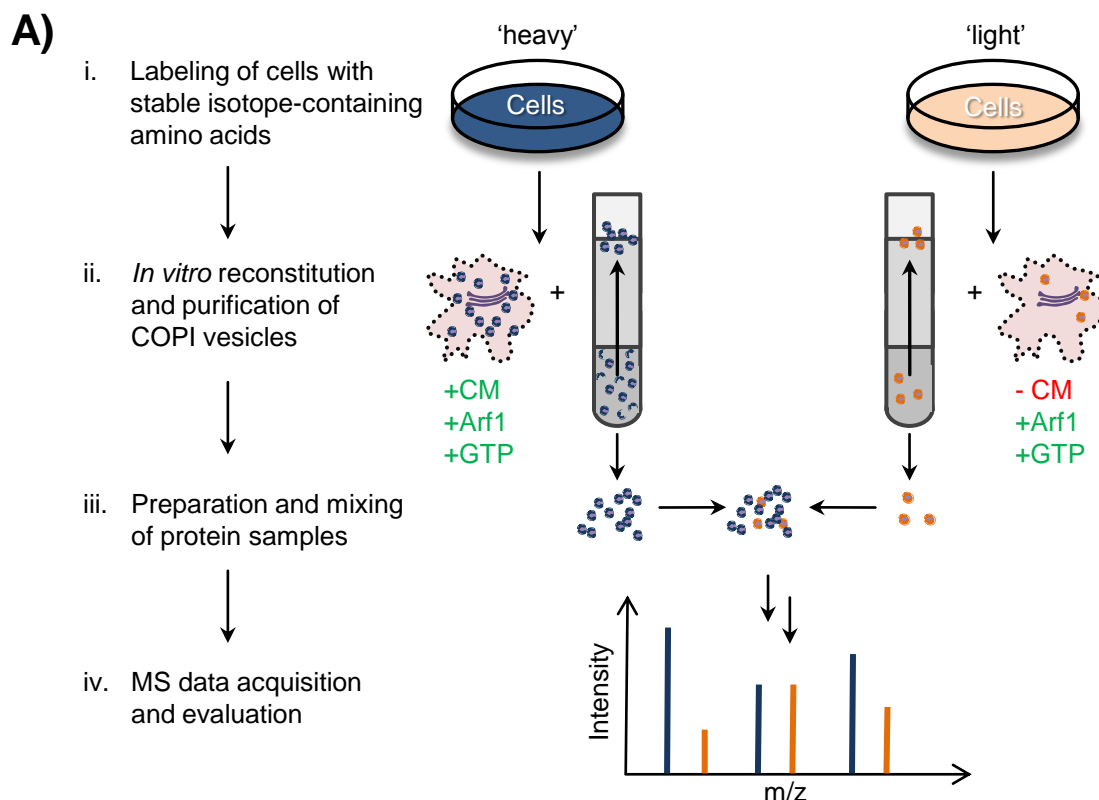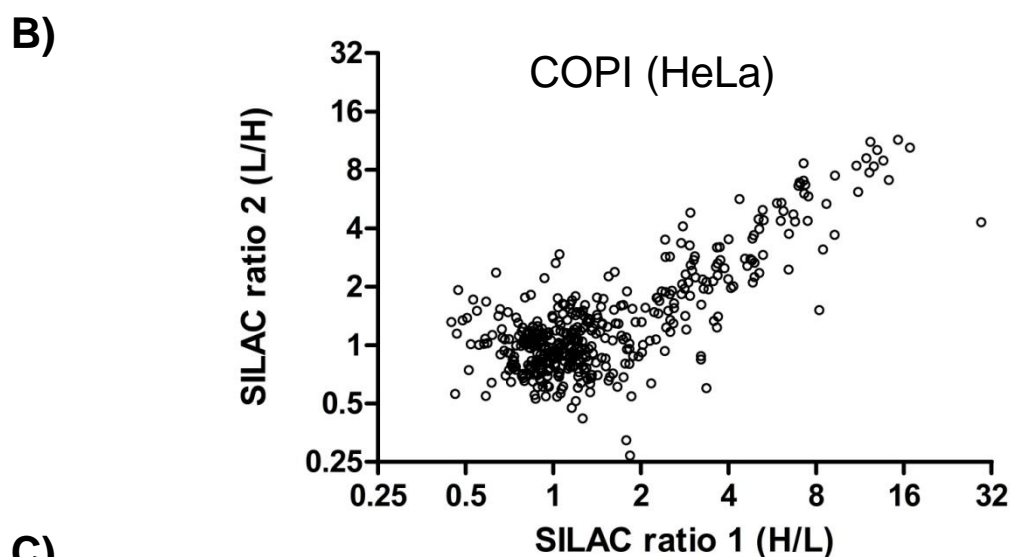

**C)**

| Gene name | SILAC ratio | SEM | Gene name | SILAC ratio | SEM | Gene name | SILAC ratio | SEM | Gene name | SILAC ratio | SEM |
|-----------|-------------|-----|-----------|-------------|-----|-----------|-------------|-----|-----------|-------------|-----|
| ZFPL1     | 15.7        | 7.4 | RABL3     | 6.0         |     | P4HB      | 3.8         | 0.2 | CALU      | 2.9         | 0.4 |
| TMED7     | 12.8        | 2.0 | B3GALT6   | 5.9         |     | ZDHHC13   | 3.7         | 1.4 | GPX8      | 2.9         | 0.1 |
| SLC35E1   | 12.3        | 1.4 | IER3IP1   | 5.9         | 0.9 | GALNT3    | 3.7         | 0.6 | CALR      | 2.8         | 0.2 |
| ERGIC3    | 12.0        | 1.7 | YIPF4     | 5.8         | 2.7 | PPIB      | 3.7         | 0.7 | GALNT10   | 2.7         | 0.4 |
| SLC30A5   | 11.7        | 1.0 | GOLT1B    | 5.7         | 0.1 | EMD       | 3.6         | 0.6 | MGAT1     | 2.7         | 0.6 |
| TMED10    | 10.8        | 1.1 | MAN1B1    | 5.5         | 1.0 | RCN1      | 3.6         | 1.0 | IGFBP7    | 2.7         | 0.3 |
| TMED4     | 10.7        | 1.5 | YIF1A     | 5.5         | 0.3 | TMEM115   | 3.6         | 1.3 | APMAP     | 2.7         | 0.2 |
| SLC30A7   | 10.7        | 1.1 | SEC22B    | 5.4         | 0.7 | TMED5     | 3.5         | 0.4 | RAB6A     | 2.7         | 0.5 |
| NUCB1     | 10.5        | 1.2 | ERP44     | 5.2         | 0.5 | MGAT2     | 3.5         | 0.5 | EXTL2     | 2.7         |     |
| TMED2     | 10.3        | 0.8 | TMEM167A  | 5.1         | 0.2 | MAN2A1    | 3.4         | 0.8 | PDIA6     | 2.7         | 0.4 |
| SLC30A6   | 10.0        | 2.2 | GORASP2   | 5.0         |     | KDEL2     | 3.4         |     | GANAB     | 2.6         | 0.2 |
| TMED9     | 9.7         | 0.7 | YIF1B     | 4.9         | 0.3 | RHOBTB3   | 3.3         |     | TM9SF1    | 2.6         | 0.7 |
| NUCB2     | 9.7         | 2.3 | FUT8      | 4.9         | 3.3 | GLT8D2    | 3.3         |     | NDC1      | 2.6         |     |
| TMED1     | 8.6         | 1.4 | KDEL1     | 4.8         | 0.8 | SCFD1     | 3.2         | 0.5 | HSPA5     | 2.6         | 0.5 |
| ERGIC2    | 8.0         | 0.4 | ERGIC1    | 4.7         | 0.9 | ARF4      | 3.2         |     | POMGNT1   | 2.5         | 1.1 |
| LMAN2L    | 7.5         | 0.3 | STX5      | 4.7         | 0.6 | BET1      | 3.2         | 0.5 | QSOX2     | 2.5         | 0.4 |
| RER1      | 7.4         | 1.1 | RAB18     | 4.6         | 0.2 | LRPAP1    | 3.1         |     | MGAT4B    | 2.5         | 0.4 |
| CNIH4     | 7.0         | 0.3 | CLU       | 4.6         | 0.6 | UBIAD1    | 3.1         | 0.9 | GOSR1     | 2.5         | 0.4 |
| SURF4     | 6.6         | 0.3 | CUX1      | 4.4         | 2.0 | SEC22A    | 3.1         |     | CHST14    | 2.5         | 0.5 |
| LMAN1     | 6.6         | 0.2 | YIPF3     | 4.3         | 0.6 | SERPINH1  | 3.1         | 0.4 | CHPF      | 2.5         |     |
| YIPF5     | 6.6         | 0.4 | MAN1A2    | 4.2         | 1.1 | LGALS3BP  | 3.1         | 1.1 | SMOC1     | 2.4         | 1.1 |
| B3GAT3    | 6.5         | 2.8 | GALNT1    | 4.2         | 0.5 | TXNDC5    | 3.1         | 0.3 | B3GNT6    | 2.4         | 1.2 |
| LMAN2     | 6.3         | 0.6 | CNPY2     | 4.2         |     | RAB2      | 3.0         | 0.4 | CYB5R3    | 2.4         | 0.4 |
| GOSR2     | 6.3         | 2.0 | LPL       | 4.1         | 1.2 | GOLGA5    | 3.0         | 0.1 | TMEM43    | 2.4         |     |
| TM9SF3    | 6.2         | 1.2 | CGREF1    | 3.8         | 1.0 | TMED3     | 3.0         | 0.5 | GOLGB1    | 2.4         | 0.5 |

Figure 3

A)

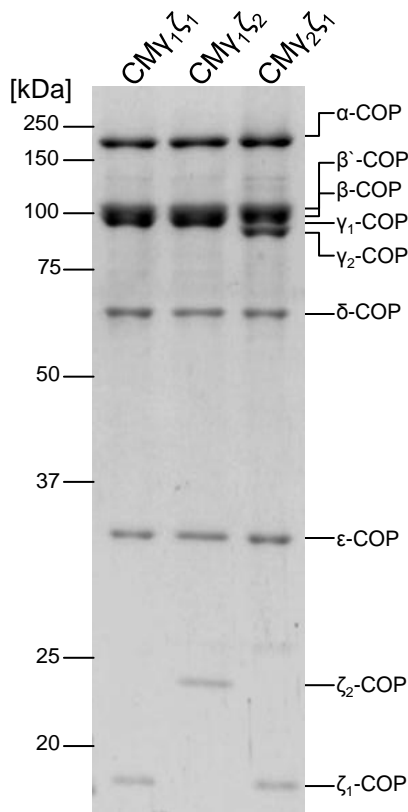

B)

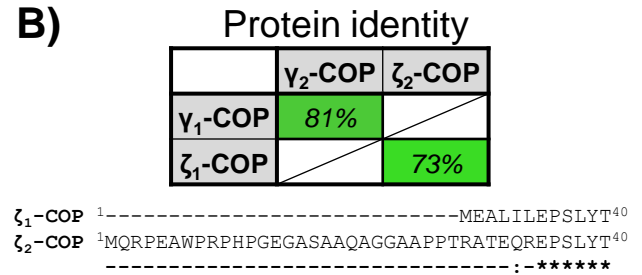

C)

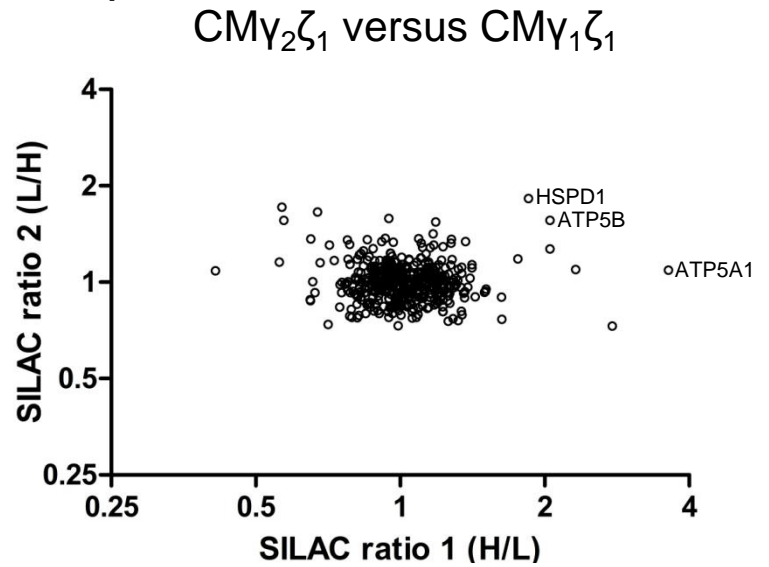

D)

| CMY <sub>1</sub> ζ <sub>1</sub> vs. CMY <sub>1</sub> ζ <sub>2</sub> |             |      | CMY <sub>1</sub> ζ <sub>2</sub> vs. CMY <sub>1</sub> ζ <sub>1</sub> |             |      | CMY <sub>1</sub> ζ <sub>1</sub> vs. CMY <sub>2</sub> ζ <sub>1</sub> |             |      | CMY <sub>2</sub> ζ <sub>1</sub> vs. CMY <sub>1</sub> ζ <sub>1</sub> |             |      |
|---------------------------------------------------------------------|-------------|------|---------------------------------------------------------------------|-------------|------|---------------------------------------------------------------------|-------------|------|---------------------------------------------------------------------|-------------|------|
| Gene name                                                           | SILAC ratio | SEM  | Gene name                                                           | SILAC ratio | SEM  | Gene name                                                           | SILAC ratio | SEM  | Gene name                                                           | SILAC ratio | SEM  |
| TM9SF1                                                              | 1,72        | 0,22 | SLC16A1                                                             | 3,75        | 2,38 | TXNDC5                                                              | 1,47        |      | ATP5A1                                                              | 2,36        | 1,27 |
| IER3IP1                                                             | 1,66        |      | RABL3                                                               | 1,71        |      | B3GALT6                                                             | 1,38        | 0,03 | HSPD1                                                               | 1,84        | 0,01 |
| POMGNT1                                                             | 1,61        | 0,34 | ROBO1                                                               | 1,59        | 0,02 | SDCBP                                                               | 1,35        |      | ATP5B                                                               | 1,81        | 0,25 |
| ZDHHC13                                                             | 1,58        | 0,30 | TLN1                                                                | 1,59        | 0,88 | RAB12                                                               | 1,34        | 0,20 | MGAT4B                                                              | 1,75        | 1,02 |
| TPBG                                                                | 1,54        | 0,10 | HEL70                                                               | 1,58        | 0,82 | QPCTL                                                               | 1,34        | 0,20 | PRDX4                                                               | 1,71        | 0,61 |
| CYB561D2                                                            | 1,54        |      | SYPL1                                                               | 1,54        |      | GNS                                                                 | 1,33        | 0,46 | MYL12A                                                              | 1,69        |      |
| TM9SF3                                                              | 1,51        | 0,18 | EZR                                                                 | 1,53        | 0,77 | PRKCSH                                                              | 1,32        |      | MYH9                                                                | 1,66        | 0,39 |
| MAN1B1                                                              | 1,50        | 0,08 | RTN3                                                                | 1,52        |      | CD276                                                               | 1,31        |      | MYH10                                                               | 1,47        | 0,29 |
| MAN1A2                                                              | 1,49        | 0,24 | IQGAP1                                                              | 1,52        |      | MFSD5                                                               | 1,31        |      | ATP2A2                                                              | 1,36        | 0,18 |
| APMAP                                                               | 1,48        | 0,03 | GLIPR2                                                              | 1,49        |      | SLC30A7                                                             | 1,29        | 0,21 | HSP90B1                                                             | 1,35        | 0,01 |
| CHPF                                                                | 1,46        | 0,03 | LRP1                                                                | 1,48        |      | RPL27                                                               | 1,28        | 0,00 | SLC9A3R2                                                            | 1,34        |      |
| GPR107                                                              | 1,46        | 0,02 | RPSA                                                                | 1,48        | 0,24 | CHST14                                                              | 1,27        | 0,01 | DNAJC13                                                             | 1,32        | 0,04 |
| TMEM23                                                              | 1,45        |      | PLXNB2                                                              | 1,47        | 0,20 | RPL13                                                               | 1,27        | 0,07 | CALR                                                                | 1,30        | 0,02 |
| SLC35E1                                                             | 1,44        | 0,10 | TUBB                                                                | 1,46        | 0,83 | FKRP                                                                | 1,26        | 0,03 | ROBO1                                                               | 1,29        | 0,12 |
| RPS8                                                                | 1,44        | 0,24 | ACSL3                                                               | 1,46        | 0,55 | RNFT1                                                               | 1,26        | 0,26 | SLC30A1                                                             | 1,29        |      |
| CUX1                                                                | 1,44        | 0,10 | BCAP31                                                              | 1,45        | 0,30 | AKR1C1                                                              | 1,25        |      | PGRMC2                                                              | 1,27        | 0,14 |
| GLT8D2                                                              | 1,44        | 0,15 | PI4K2A                                                              | 1,44        | 0,06 | PTPRF                                                               | 1,25        | 0,03 | MGAT5                                                               | 1,26        | 0,32 |
| GALNT1                                                              | 1,43        | 0,16 | PLEKHC1                                                             | 1,44        | 0,44 | KDEL3                                                               | 1,24        | 0,03 | GLT8D2                                                              | 1,26        | 0,36 |
| MGAT2                                                               | 1,43        | 0,11 | BASP1                                                               | 1,43        | 0,46 | ITGB5                                                               | 1,24        | 0,02 | CANX                                                                | 1,26        | 0,03 |
| YIPF3                                                               | 1,43        | 0,03 | ATP7A                                                               | 1,42        |      | GNB2                                                                | 1,22        |      | PIP5K1A                                                             | 1,26        | 0,15 |
| UXS1                                                                | 1,42        | 0,18 | COPE                                                                | 1,41        |      | B3GAT3                                                              | 1,22        | 0,04 | POR                                                                 | 1,24        | 0,07 |
| MGAT1                                                               | 1,41        | 0,27 | PABPC1                                                              | 1,41        | 0,20 | CHSY1                                                               | 1,21        |      | MYL6                                                                | 1,23        | 0,28 |
| TMEM165                                                             | 1,41        | 0,01 | PKM                                                                 | 1,40        | 0,44 | NDC1                                                                | 1,20        | 0,12 | PLOD2                                                               | 1,23        | 0,05 |
| TM9SF4                                                              | 1,41        | 0,23 | HNRNPM                                                              | 1,40        | 0,03 | MGAT2                                                               | 1,20        | 0,03 | IFITM3                                                              | 1,23        | 0,14 |
| RPL21                                                               | 1,41        | 0,19 | RPL18                                                               | 1,40        |      | GGH                                                                 | 1,20        | 0,55 | SLC38A10                                                            | 1,23        | 0,12 |

E)

|                 | rat CM | CMY <sub>1</sub> ζ <sub>1</sub> | CMY <sub>1</sub> ζ <sub>2</sub> | CMY <sub>2</sub> ζ <sub>1</sub> |
|-----------------|--------|---------------------------------|---------------------------------|---------------------------------|
| Ø Diameter [nm] | 73,8   | 74,4                            | 74,2                            | 73,4                            |
| SD [nm]         | 7,7    | 8,9                             | 8,6                             | 8,8                             |
| n               | 78     | 111                             | 97                              | 79                              |



Figure 4

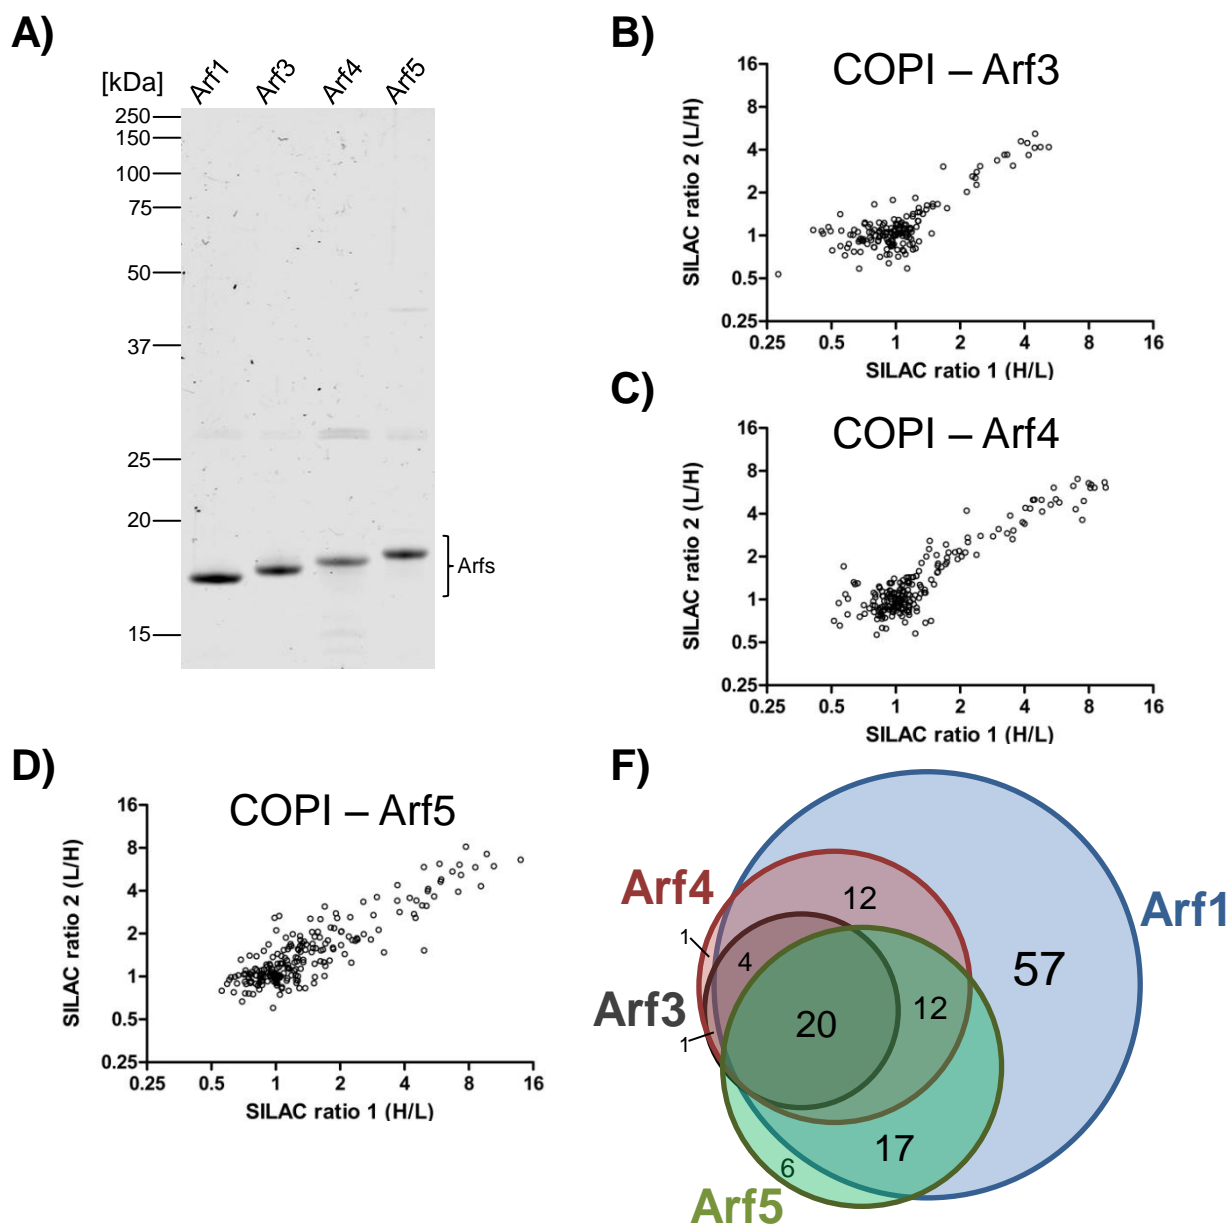

**E)**

| Arf3      |             |      | Arf4      |             |      | Arf5      |             |      |
|-----------|-------------|------|-----------|-------------|------|-----------|-------------|------|
| Gene name | SILAC ratio | SEM  | Gene name | SILAC ratio | SEM  | Gene name | SILAC ratio | SEM  |
| TMED9     | 4,84        | 0,35 | ERGIC3    | 8,06        | 1,42 | TMED7     | 10,30       | 3,69 |
| ERGIC3    | 4,68        | 0,51 | ERGIC2    | 7,85        | 1,74 | ZFPL1     | 9,32        |      |
| NUCB1     | 4,46        | 0,29 | SLC30A7   | 7,65        |      | TMED10    | 8,47        | 1,23 |
| TMED10    | 4,30        | 0,17 | NUCB1     | 7,31        | 0,92 | NUCB1     | 8,21        | 2,26 |
| ERP44     | 4,29        | 0,17 | TMED7     | 7,30        | 1,20 | TMED9     | 7,96        | 0,20 |
| LMAN1     | 4,22        | 0,37 | TMED10    | 7,27        | 0,73 | ERGIC2    | 7,22        | 1,37 |
| TMED2     | 3,93        | 0,26 | TMED9     | 7,11        | 1,03 | TMED2     | 6,72        | 2,40 |
| TMED4     | 3,51        | 0,19 | LMAN1     | 7,06        | 0,03 | TMED4     | 6,67        | 0,57 |
| TMED7     | 3,46        |      | ZFPL1     | 6,85        |      | YIF1A     | 6,26        | 1,10 |
| LMAN2     | 3,45        | 0,23 | TMED4     | 6,52        | 0,25 | LMAN1     | 6,08        | 0,63 |
| SURF4     | 3,31        | 0,23 | SLC35E1   | 6,25        | 1,34 | TM9SF3    | 6,00        | 0,17 |
| SEC22B    | 3,17        | 0,19 | CALU      | 5,83        |      | TMED1     | 5,53        | 1,60 |
| ERGIC2    | 2,82        |      | ERP44     | 5,79        | 0,30 | SDF4      | 5,39        | 0,46 |
| SLC35E1   | 2,78        | 0,29 | TMED2     | 5,62        | 1,32 | LMAN2     | 5,37        | 0,57 |
| SLC30A7   | 2,72        |      | TMED1     | 5,54        | 1,92 | ERP44     | 5,27        | 0,64 |
| GOLT1B    | 2,59        | 0,20 | LMAN2     | 5,33        | 0,28 | SEC22B    | 4,64        | 0,52 |
| IER3IP1   | 2,53        |      | YIF1A     | 5,31        | 0,51 | SLC35E1   | 4,62        |      |
| CNIH4     | 2,51        |      | CNIH4     | 5,05        |      | YIPF5     | 4,58        | 0,93 |
| YIF1B     | 2,45        | 0,09 | RER1      | 4,97        | 0,34 | SURF4     | 4,56        | 0,58 |
| STX5      | 2,44        | 0,16 | YIPF5     | 4,91        | 0,10 | ERGIC1    | 4,10        | 0,97 |
| CLU       | 2,36        | 0,69 | SURF4     | 4,74        | 0,28 | NUCB2     | 4,05        | 0,33 |
| ERGIC1    | 2,33        | 0,06 | LMAN2L    | 4,71        |      | GALNT1    | 4,00        | 0,84 |
| RAB18     | 2,09        | 0,06 | NUCB2     | 4,69        | 0,31 | CLU       | 3,98        | 0,57 |
| ZFPL1     | 2,04        |      | SEC22B    | 4,50        | 0,35 | GOLT1B    | 3,89        | 0,34 |
| PRAF2     | 2,01        |      | CLU       | 4,30        | 0,05 | YIF1B     | 3,59        | 0,84 |

Figure 5

A)

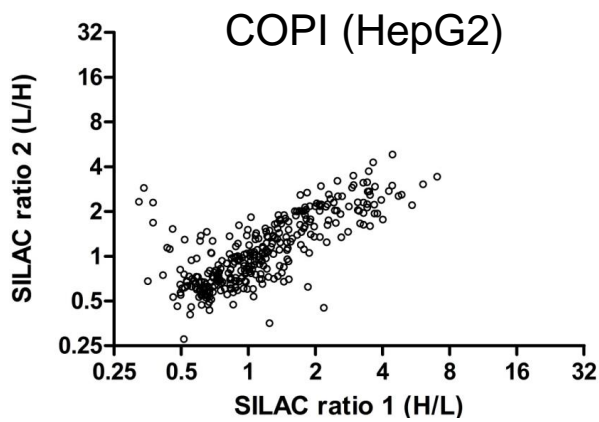

B)

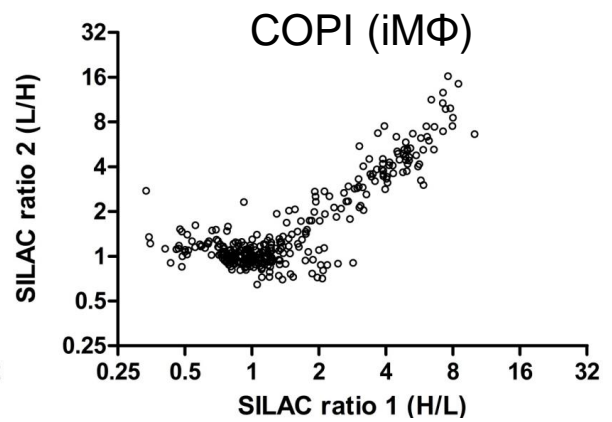

C)

| HepG2     |             |     |           |             |     |
|-----------|-------------|-----|-----------|-------------|-----|
| Gene name | SILAC ratio | SEM | Gene name | SILAC ratio | SEM |
| SLC35E1   | 5.2         | 1.8 | TMED2     | 2.9         | 0.9 |
| SEC22A    | 4.9         |     | UBIAD1    | 2.9         | 0.4 |
| ZFPL1     | 4.6         | 0.2 | NUCB2     | 2.8         | 0.6 |
| RER1      | 4.6         | 1.5 | TMED5     | 2.8         | 0.9 |
| TM9SF3    | 3.9         | 0.3 | YIPF5     | 2.8         | 0.5 |
| ERGIC2    | 3.8         | 1.6 | LMAN1     | 2.8         | 0.6 |
| TMED9     | 3.7         | 1.1 | ZDHHC17   | 2.7         |     |
| NUCB1     | 3.7         | 0.7 | SEC22B    | 2.7         | 0.4 |
| TMED1     | 3.6         | 1.1 | TMEM167A  | 2.7         |     |
| GOLGA5    | 3.6         | 0.1 | SLC30A7   | 2.6         |     |
| TMED10    | 3.5         | 0.8 | LMAN2L    | 2.6         | 0.7 |
| TMED7     | 3.3         | 0.4 | ATP2C1    | 2.6         | 0.0 |
| FUT8      | 3.3         | 0.1 | ERGIC3    | 2.6         | 0.6 |
| MAN1B1    | 3.2         | 0.3 | LMAN2     | 2.6         | 0.5 |
| PIGG      | 3.2         | 0.1 | GOLT1B    | 2.6         | 1.0 |
| SURF4     | 3.2         | 0.8 | CALU      | 2.5         |     |
| B3GAT3    | 3.1         | 0.4 | POMGNT1   | 2.5         | 0.4 |
| XYLT2     | 3.1         |     | MAN1A2    | 2.5         | 0.0 |
| TMED4     | 3.1         | 0.4 | RAB18     | 2.5         | 0.3 |
| B4GALT7   | 3.1         |     | TMED3     | 2.5         | 0.8 |
| SLC30A6   | 3.1         | 0.5 | GALNT2    | 2.4         | 0.2 |
| QPCTL     | 3.0         | 0.0 | ERP44     | 2.4         | 0.8 |
| AFP       | 2.9         | 0.7 | SLC35B3   | 2.4         | 0.0 |
| GALNT1    | 2.9         | 0.0 | FAM198B   | 2.4         | 0.1 |
| GOSR2     | 2.9         | 1.1 | YIF1A     | 2.3         | 0.2 |

D)

| iMΦ        |             |     |           |             |     |
|------------|-------------|-----|-----------|-------------|-----|
| Gene name  | SILAC ratio | SEM | Gene name | SILAC ratio | SEM |
| NUCB1      | 11.9        | 4.3 | B4GAT1    | 5.5         |     |
| TMED7      | 11.5        | 3.0 | ZDHHC13   | 5.4         | 1.0 |
| TMED9      | 9.9         | 2.7 | LMAN2     | 5.4         | 0.5 |
| TMED10     | 8.9         | 1.8 | MAN2A2    | 5.2         | 0.1 |
| TMED2      | 8.8         | 2.4 | GNPTAB    | 5.2         | 1.5 |
| NUCB2      | 8.8         | 1.1 | TM9SF1    | 5.1         | 0.3 |
| TMED4      | 8.6         | 1.2 | MGAT5     | 5.1         | 0.1 |
| SLC30A5    | 8.3         | 1.7 | MAN1A2    | 5.1         | 0.1 |
| SLC38A10   | 8.3         | 0.3 | GOLM1     | 5.0         | 0.2 |
| SLC30A7    | 7.7         | 0.2 | UGCG      | 5.0         |     |
| SLC35E1    | 7.4         |     | RER1      | 4.9         | 0.7 |
| GALNT1     | 7.1         | 0.1 | TMED5     | 4.9         | 0.2 |
| QSOX2      | 7.0         | 0.4 | ENTPD7    | 4.9         | 0.1 |
| ERGIC2     | 6.8         | 0.7 | SPP1      | 4.8         |     |
| MAN2A1     | 6.2         | 0.1 | ZFPL1     | 4.8         |     |
| GOLIM4     | 6.1         | 0.1 | SURF4     | 4.8         | 0.8 |
| CHPF2      | 6.0         |     | MAN1A     | 4.8         | 0.1 |
| TM9SF3     | 6.0         | 0.2 | GALNT2    | 4.8         | 0.3 |
| MGAT1      | 6.0         | 0.7 | APMAP     | 4.8         |     |
| CSGALNACT2 | 5.9         |     | GOLGA5    | 4.7         | 0.3 |
| ERGIC3     | 5.9         | 0.7 | MGAT2     | 4.7         | 0.2 |
| XYLT2      | 5.7         | 1.8 | LMAN1     | 4.7         | 0.2 |
| GXYLT1     | 5.7         |     | B3GAT3    | 4.7         |     |
| SLC35C1    | 5.7         |     | SEC22B    | 4.6         | 0.4 |
| MAN1B1     | 5.5         | 0.3 | RNFT1     | 4.6         |     |

E)

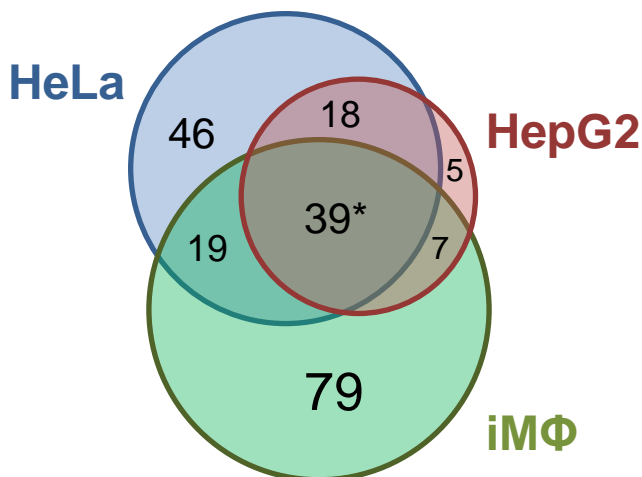

F)

| Gene names (39*) |         |
|------------------|---------|
| ATP2C1           | QSOX2   |
| B3GAT3           | RAB18   |
| CHST14           | RER1    |
| CUX1             | SEC22B  |
| ERGIC1           | SLC30A6 |
| ERGIC2           | SLC30A7 |
| ERGIC3           | SLC35E1 |
| ERP44            | STX5    |
| GALNT1           | SURF4   |
| GOLGA5           | TM9SF1  |
| KDELRL1          | TM9SF3  |
| LMAN1            | TMED10  |
| LMAN2            | TMED2   |
| MAN1A2           | TMED4   |
| MAN1B1           | TMED5   |
| MGAT2            | TMED7   |
| MGAT4B           | TMED9   |
| NUCB1            | YIPF3   |
| NUCB2            | ZFPL1   |
| POMGNT1          |         |

Figure 6

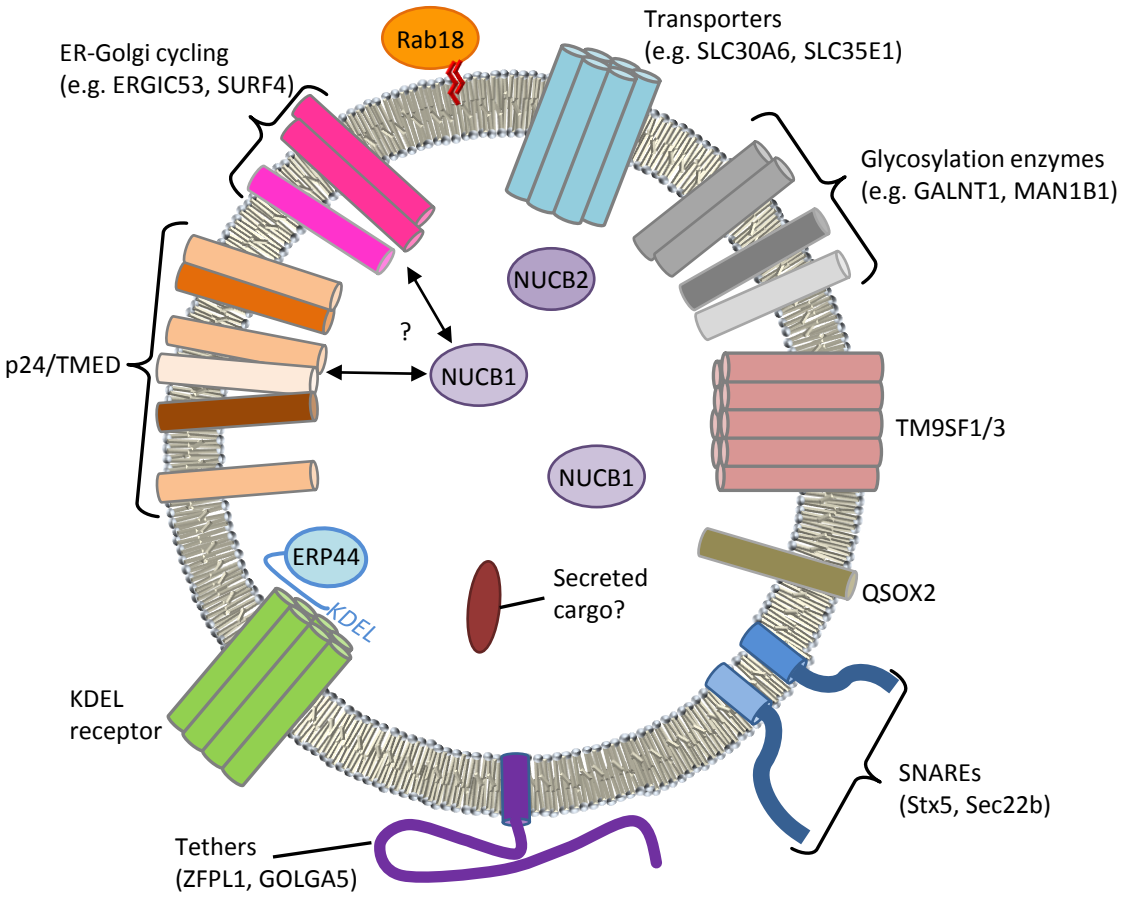

Figure S1

A)

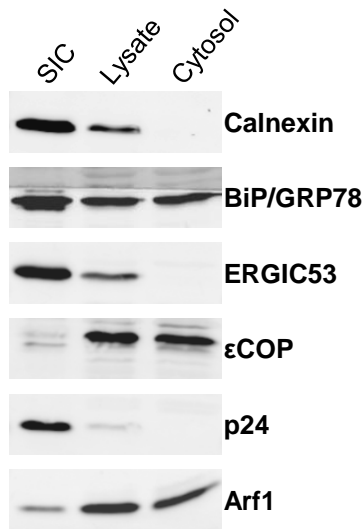

B)

| SIC with Arf, CM, GTPγS with Cytosol |             |      |           |             |      |
|--------------------------------------|-------------|------|-----------|-------------|------|
| Gene name                            | SILAC ratio | SEM  | Gene name | SILAC ratio | SEM  |
| SSR1                                 | 6.91        |      | RTN4      | 3.11        | 0.44 |
| ILVBL                                | 6.53        | 0.23 | FADS1     | 3.11        |      |
| SSR4                                 | 5.95        |      | RDH11     | 3.11        | 0.24 |
| APMAP                                | 5.93        | 0.56 | CYB5R3    | 3.10        | 0.20 |
| TOR1AIP2                             | 5.62        |      | EPHX1     | 3.07        | 0.28 |
| HACD3                                | 5.48        |      | ATP6AP1   | 3.05        | 0.35 |
| ATL2                                 | 4.95        | 0.09 | ACSL3     | 3.03        | 0.29 |
| LSS                                  | 4.82        | 0.10 | LPCAT1    | 3.02        | 0.21 |
| TMEM33                               | 4.80        | 0.41 | DDOST     | 3.00        | 0.02 |
| TOR1A                                | 4.63        |      | SPCS2     | 2.99        |      |
| CYB5B                                | 4.48        |      | POR       | 2.93        | 0.02 |
| ATL3                                 | 3.98        | 0.37 | TMX1      | 2.90        | 0.38 |
| ARL6IP1                              | 3.97        | 0.24 | ALDH3A2   | 2.89        |      |
| NSDHL                                | 3.90        | 0.25 | ATP2A2    | 2.81        | 0.02 |
| CLPTM1L                              | 3.86        |      | RPN1      | 2.76        | 0.10 |
| FAM134C                              | 3.82        | 0.05 | ASPH      | 2.71        |      |
| VAPA                                 | 3.65        | 0.43 | CYP51A1   | 2.66        | 0.02 |
| PGRMC1                               | 3.64        | 0.28 | AP1B1     | 2.62        | 0.08 |
| TMCO1                                | 3.62        |      | LRCH4     | 2.60        | 0.71 |
| VAPB                                 | 3.61        | 0.20 | PDIA3     | 2.59        | 0.32 |
| DHCR7                                | 3.57        |      | PDIA6     | 2.47        | 0.38 |
| REEP5                                | 3.48        | 0.52 | ARF4      | 2.45        | 0.04 |
| ESYT2                                | 3.46        | 0.21 | AP1M1     | 2.42        | 0.22 |
| ARL6IP5                              | 3.41        | 0.46 | ER3IP1    | 2.41        | 0.96 |
| PGRMC2                               | 3.36        | 1.12 | SLMAP     | 2.39        |      |
| ARFIP1                               | 3.35        | 0.91 | PRKCSH    | 2.27        |      |
| TMEM43                               | 3.35        | 0.44 | HSPA5     | 2.25        | 0.04 |
| BCAP31                               | 3.29        | 0.63 | GPX8      | 2.18        | 0.52 |
| FADS2                                | 3.29        |      | PLOD2     | 2.18        | 0.43 |
| HMOX1                                | 3.25        |      | EMD       | 2.17        | 0.53 |
| COMT                                 | 3.22        | 0.36 | AP1G1     | 2.16        |      |
| FAM62A                               | 3.22        | 0.18 | CALR      | 2.14        |      |
| RTN3                                 | 3.15        | 0.65 | HSP90B1   | 2.09        | 0.19 |
| CANX                                 | 3.13        | 0.52 | TMED5     | 2.03        | 0.46 |
| RTN1                                 | 3.12        | 0.42 | AAAS      | 2.02        | 0.05 |

C)

| SIC with GTPγS and Cytosol |             |      |           |             |      |
|----------------------------|-------------|------|-----------|-------------|------|
| Gene name                  | SILAC ratio | SEM  | Gene name | SILAC ratio | SEM  |
| CAT                        | 6.77        |      | FAM134C   | 2.82        | 0.33 |
| ATL2                       | 4.41        | 0.41 | EPHX1     | 2.73        | 0.03 |
| POR                        | 3.53        |      | LRCH4     | 2.68        | 0.20 |
| ESYT2                      | 3.50        | 0.25 | RDH11     | 2.63        | 0.52 |
| ATL3                       | 3.42        | 0.05 | RPN1      | 2.62        | 0.13 |
| VAPB                       | 3.24        |      | PGRMC2    | 2.59        | 0.05 |
| PRAF2                      | 3.24        |      | ACSL3     | 2.37        |      |
| REEP5                      | 3.19        | 0.06 | LSS       | 2.36        |      |
| RTN3                       | 3.16        | 0.04 | PDIA3     | 2.29        | 0.01 |
| ARL6IP1                    | 3.13        | 0.02 | TMEM33    | 2.26        |      |
| FAM62A                     | 3.12        | 0.13 | ATP2A2    | 2.25        |      |
| CANX                       | 3.12        | 0.04 | CYB5R3    | 2.23        |      |
| RTN1                       | 3.09        |      | AP1M1     | 2.22        | 0.09 |
| RTN4                       | 3.06        | 0.01 | HSPA5     | 2.15        | 0.02 |
| BCAP31                     | 3.00        | 0.16 | SSR4      | 2.11        |      |
| VAPA                       | 2.99        | 0.20 | AP1G1     | 2.09        | 0.12 |
| NSDHL                      | 2.93        |      | HM13      | 2.07        |      |
| ARL6IP5                    | 2.92        | 0.10 | GOLT1B    | 2.07        | 0.01 |
| PGRMC1                     | 2.86        | 0.04 | SERPINH1  | 2.02        | 0.17 |



Figure S2

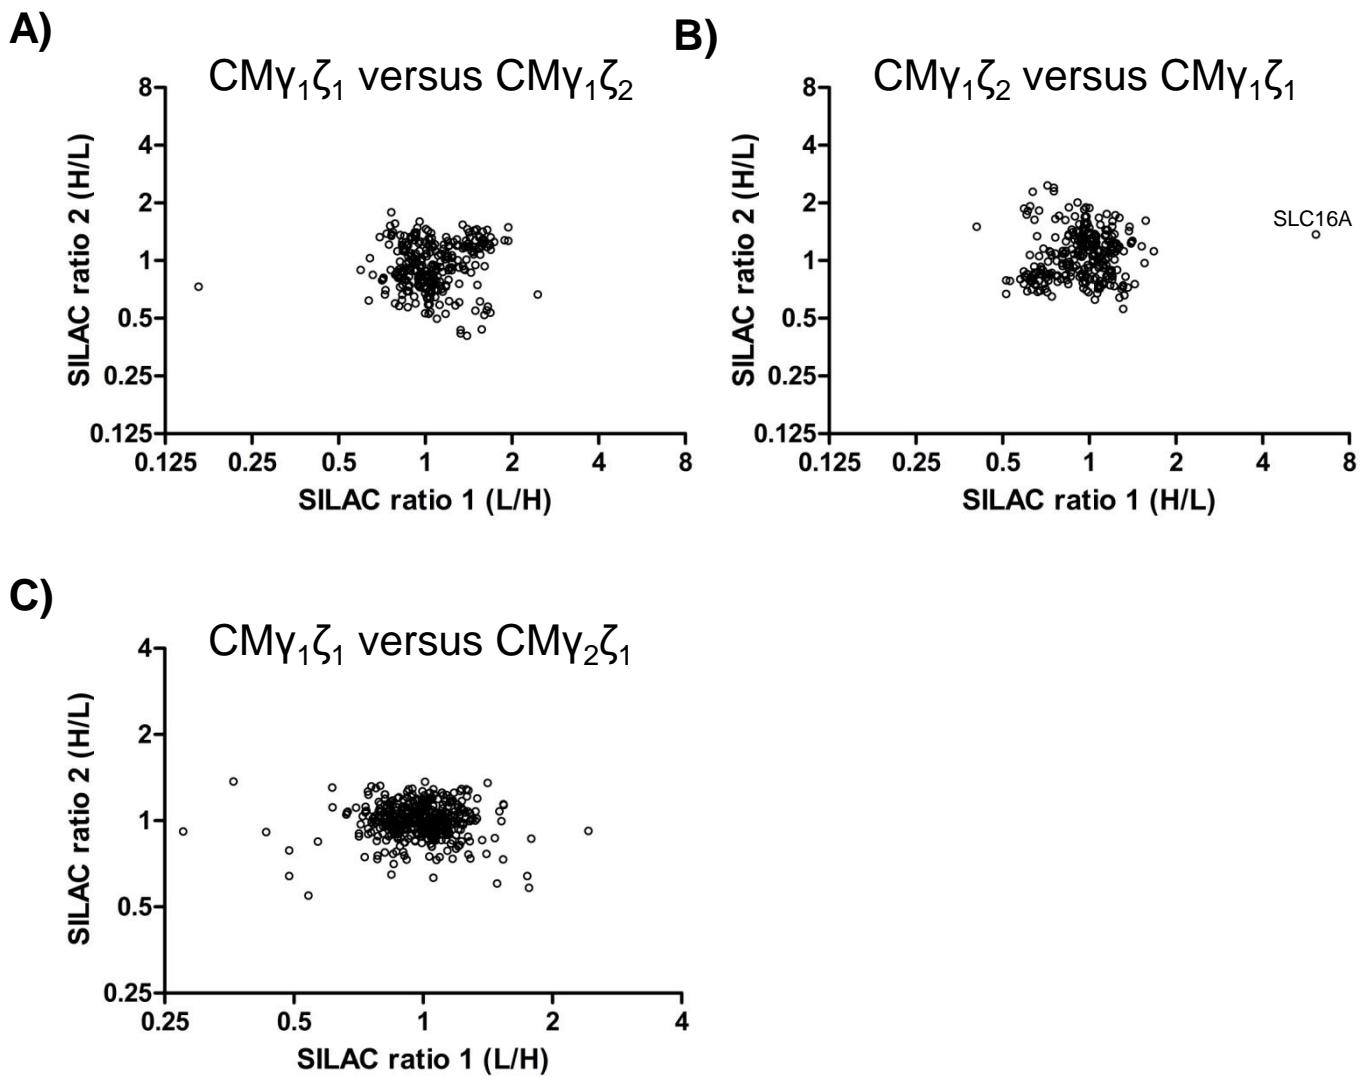

Figure S3

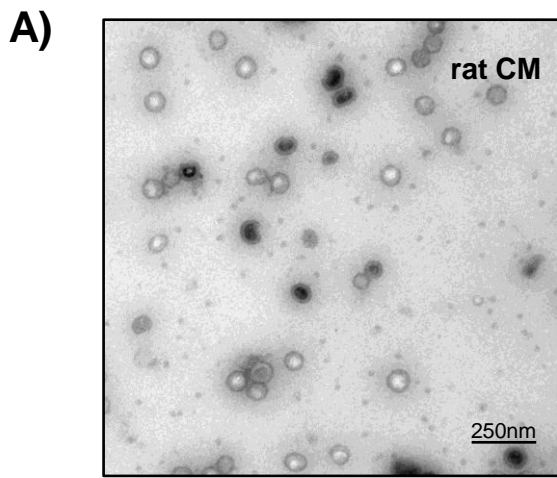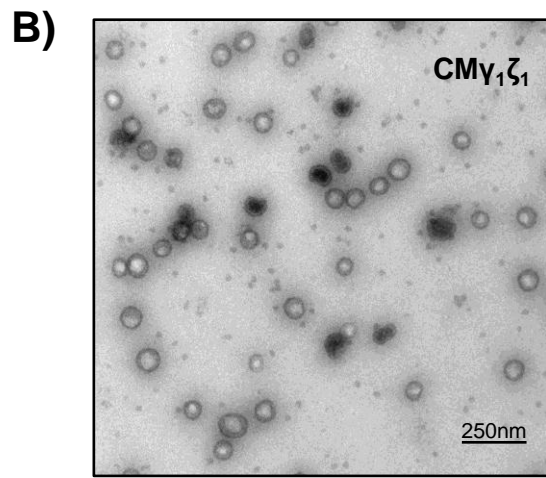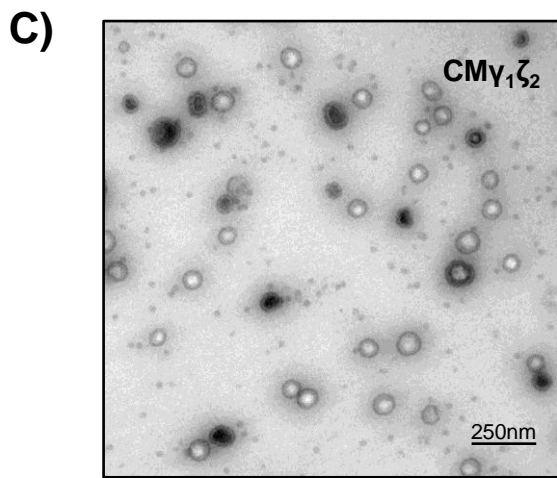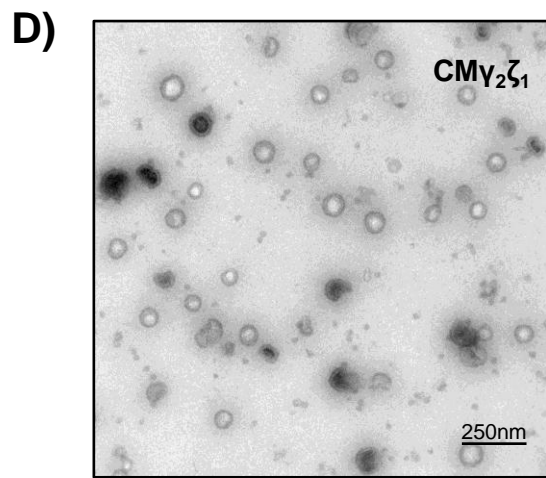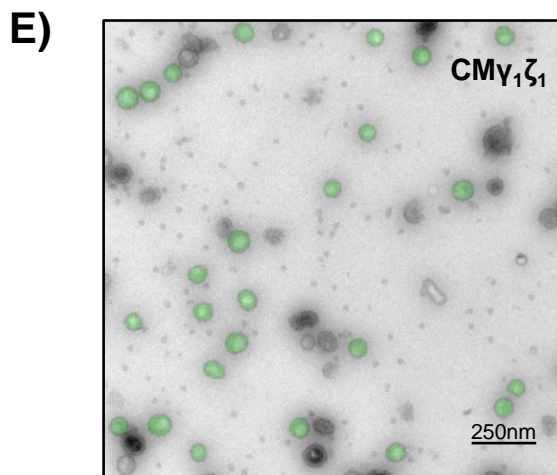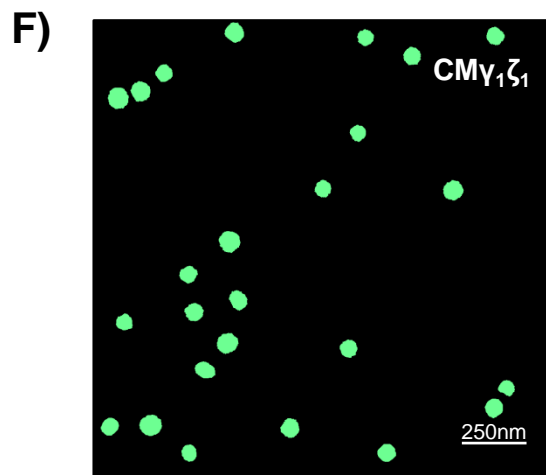

Source: https://www.biorxiv.org/content/10.1101/254052v1.full.pdf
